# Supplementary material for: De novo assembly of the complete mitochondrial genome of sweet potato (Ipomoea batatas [L.] Lam) revealed the existence of homologous conformations generated by the repeat-mediated recombination
Source: PubMed Central journal article supplement (PMC9185937; doi:10.1186/s12870-022-03665-y), 2022-06-10
Supplement: 12870_2022_3665_MOESM1_ESM.pdf [file 12870_2022_3665_MOESM1_ESM.pdf]

1 **Table S1 The primers design for repeats mediate the homologous recombination *I.***  
 2 ***batatas.***

| Repeat number | Primer name | Primer sequence          |
|---------------|-------------|--------------------------|
| Repeat1       | F1          | CTATCCCATCCCGTTCCTTTATC  |
|               | R1          | GTATCATCCACACCCAGTCAC    |
|               | F2          | GTCCAGCTTACGGACATAACA    |
|               | R2          | TAGGAACCTCCAAACCAAGAAG   |
| Repeat2       | F1          | CGCATAGATTCCGCCTAAGAG    |
|               | R1          | CCTTGAACTACCGGAGCATTAT   |
|               | F2          | GTGGGAGTTAGAGCAAGAGTTAG  |
|               | R2          | CCTGTGGCTGGCTATCTTATC    |
| Repeat3       | F1          | CTTCACGCCCTTTCATTCTTATTC |
|               | R1          | ATTCGAGGCGTCAGCAAA       |
|               | F2          | TACTCGGACTTGGGTCTCTC     |
|               | R2          | GGTTGCTCTGGGATAAAGT      |

3

4

5 **Table S2 Microsatellite repeats in the mitogenome.** The structure of Microsatellite  
6 repeats is presented as repeat units surrounded with parenthesis and the numbers of  
7 repeat units.

| Type | Structure of<br>Microsatellite Repeats | Size (bp) | Start | End   |
|------|----------------------------------------|-----------|-------|-------|
| p1   | (T)11                                  | 11        | 3590  | 3600  |
| p4   | (AAGA)3                                | 12        | 6730  | 6741  |
| p4   | (TAAA)3                                | 12        | 12835 | 12846 |
| p6   | (GGCCAA)3                              | 18        | 17053 | 17070 |
| p6   | (GGTCCT)3                              | 18        | 22083 | 22100 |
| p4   | (AAGA)3                                | 12        | 30048 | 30059 |
| p3   | (GAA)4                                 | 12        | 37363 | 37374 |
| p4   | (AATT)3                                | 12        | 41255 | 41266 |
| p4   | (CTTA)3                                | 12        | 56310 | 56321 |
| p4   | (AATA)3                                | 12        | 71407 | 71418 |
| p2   | (TA)5                                  | 10        | 72849 | 72858 |
| p2   | (TA)5                                  | 10        | 76540 | 76549 |
| p1   | (A)10                                  | 10        | 77977 | 77986 |
| p4   | (TCTT)3                                | 12        | 78565 | 78576 |
| p4   | (AAAG)3                                | 12        | 79747 | 79758 |
| p5   | (ATTAC)3                               | 15        | 83321 | 83335 |
| p4   | (CTTT)3                                | 12        | 83803 | 83814 |
| p3   | (TAA)4                                 | 12        | 86863 | 86874 |
| p4   | (AAGG)3                                | 12        | 92437 | 92448 |
| p4   | (GTGA)3                                | 12        | 94926 | 94937 |
| p6   | (GACAGG)3                              | 18        | 96744 | 96761 |

---

|    |          |    |        |        |
|----|----------|----|--------|--------|
| p2 | (CT)5    | 10 | 101754 | 101763 |
| p2 | (AT)5    | 10 | 102138 | 102147 |
| p4 | (TTCA)3  | 12 | 106239 | 106250 |
| p5 | (ACTAG)3 | 15 | 107082 | 107096 |
| p1 | (A)10    | 10 | 109742 | 109751 |
| p2 | (AT)5    | 10 | 110782 | 110791 |
| p2 | (TA)6    | 12 | 115146 | 115157 |
| p1 | (T)10    | 10 | 120392 | 120401 |
| p4 | (AAAG)3  | 12 | 131210 | 131221 |
| p1 | (A)10    | 10 | 135025 | 135034 |
| p3 | (TAA)4   | 12 | 136768 | 136779 |
| p4 | (AAGA)3  | 12 | 136864 | 136875 |
| p3 | (TAA)4   | 12 | 137314 | 137325 |
| p2 | (GA)5    | 10 | 138761 | 138770 |
| p4 | (AAAG)3  | 12 | 141026 | 141037 |
| p4 | (AAGC)3  | 12 | 142693 | 142704 |
| p4 | (GAGC)3  | 12 | 145975 | 145986 |
| p1 | (T)10    | 10 | 147206 | 147215 |
| p5 | (AATAG)4 | 20 | 167955 | 167974 |
| p2 | (CT)5    | 10 | 168178 | 168187 |
| p4 | (ACCT)3  | 12 | 168283 | 168294 |
| p3 | (TCT)4   | 12 | 171601 | 171612 |
| p3 | (TCT)4   | 12 | 173891 | 173902 |
| p4 | (ACCG)3  | 12 | 182160 | 182171 |
| p2 | (AG)5    | 10 | 183347 | 183356 |

---

---

|    |           |    |        |        |
|----|-----------|----|--------|--------|
| p1 | (T)11     | 11 | 183597 | 183607 |
| p4 | (ACAA)3   | 12 | 185476 | 185487 |
| p4 | (TAAA)3   | 12 | 186528 | 186539 |
| p2 | (AG)6     | 12 | 192358 | 192369 |
| p1 | (T)10     | 10 | 193998 | 194007 |
| p4 | (TTTC)3   | 12 | 194190 | 194201 |
| p4 | (CTGG)3   | 12 | 195039 | 195050 |
| p1 | (A)10     | 10 | 195396 | 195405 |
| p4 | (TTCT)3   | 12 | 195990 | 196001 |
| p4 | (GAAT)3   | 12 | 197763 | 197774 |
| p4 | (CCTT)3   | 12 | 198897 | 198908 |
| p4 | (AGAA)3   | 12 | 200282 | 200293 |
| p2 | (AT)5     | 10 | 208006 | 208015 |
| p1 | (A)10     | 10 | 208935 | 208944 |
| p2 | (CT)5     | 10 | 211947 | 211956 |
| p4 | (ACTT)3   | 12 | 212290 | 212301 |
| p1 | (T)10     | 10 | 218580 | 218589 |
| p3 | (TTC)4    | 12 | 220589 | 220600 |
| p6 | (CTTATT)3 | 18 | 220618 | 220635 |
| p2 | (AT)9     | 18 | 235423 | 235440 |
| p2 | (AG)5     | 10 | 238040 | 238049 |
| p1 | (T)10     | 10 | 250971 | 250980 |
| p3 | (TTC)4    | 12 | 251492 | 251503 |
| p4 | (TGAA)3   | 12 | 260990 | 261001 |

---

10 **Table S3 Dispersed repeats in the mitogenome.**

| The repeat length of the first part | The starting site of the first part | Matching direction | The repeat length of the second part | The starting site of the second part | interval distance of repeats | E-value   |
|-------------------------------------|-------------------------------------|--------------------|--------------------------------------|--------------------------------------|------------------------------|-----------|
| 915                                 | 8351                                | P                  | 915                                  | 51703                                | 0                            | 0.00E+00  |
| 562                                 | 58162                               | F                  | 562                                  | 218675                               | 0                            | 0.00E+00  |
| 382                                 | 10137                               | F                  | 382                                  | 215700                               | 0                            | 2.12E-220 |
| 289                                 | 10512                               | F                  | 289                                  | 163556                               | -3                           | 2.23E-156 |
| 264                                 | 64325                               | F                  | 264                                  | 213144                               | 0                            | 2.34E-149 |
| 189                                 | 106440                              | F                  | 189                                  | 177381                               | 0                            | 3.34E-104 |
| 193                                 | 40238                               | P                  | 193                                  | 163451                               | -1                           | 7.55E-104 |
| 170                                 | 212786                              | P                  | 170                                  | 261907                               | 0                            | 9.17E-93  |
| 163                                 | 121161                              | F                  | 163                                  | 227243                               | 0                            | 1.50E-88  |
| 142                                 | 29011                               | F                  | 142                                  | 77686                                | 0                            | 6.61E-76  |
| 140                                 | 124864                              | F                  | 140                                  | 159976                               | 0                            | 1.06E-74  |
| 137                                 | 65820                               | P                  | 137                                  | 74780                                | 0                            | 6.77E-73  |
| 145                                 | 105132                              | P                  | 145                                  | 269458                               | -2                           | 9.71E-73  |
| 129                                 | 171859                              | P                  | 129                                  | 261961                               | 0                            | 4.44E-68  |
| 128                                 | 9723                                | P                  | 128                                  | 42677                                | 0                            | 1.77E-67  |

---

|     |        |   |     |        |    |          |
|-----|--------|---|-----|--------|----|----------|
| 126 | 64429  | P | 126 | 249836 | 0  | 2.84E-66 |
| 126 | 213248 | P | 126 | 249836 | 0  | 2.84E-66 |
| 121 | 56632  | P | 121 | 84571  | 0  | 2.91E-63 |
| 124 | 83106  | F | 124 | 84570  | -1 | 1.69E-62 |
| 130 | 28986  | F | 130 | 77556  | -3 | 1.07E-61 |
| 118 | 146002 | P | 118 | 167429 | 0  | 1.86E-61 |
| 121 | 56632  | P | 121 | 83107  | -1 | 1.06E-60 |
| 116 | 171872 | F | 116 | 212786 | 0  | 2.98E-60 |
| 117 | 41473  | P | 117 | 84563  | -1 | 2.61E-58 |
| 112 | 25072  | P | 112 | 83107  | 0  | 7.62E-58 |
| 111 | 36411  | F | 111 | 105196 | 0  | 3.05E-57 |
| 110 | 41473  | P | 110 | 83106  | 0  | 1.22E-56 |
| 109 | 25075  | F | 109 | 41473  | 0  | 4.88E-56 |
| 112 | 25072  | F | 112 | 56641  | -1 | 2.56E-55 |
| 112 | 25072  | P | 112 | 84571  | -1 | 2.56E-55 |
| 105 | 29011  | F | 105 | 77581  | 0  | 1.25E-53 |
| 105 | 77581  | F | 105 | 77686  | 0  | 1.25E-53 |
| 105 | 184097 | P | 105 | 270106 | 0  | 1.25E-53 |
| 109 | 41473  | F | 109 | 56644  | -1 | 1.60E-53 |
| 104 | 26391  | P | 104 | 171359 | 0  | 5.00E-53 |
| 103 | 39330  | P | 103 | 106442 | 0  | 2.00E-52 |
| 103 | 39330  | P | 103 | 177383 | 0  | 2.00E-52 |
| 103 | 18834  | F | 103 | 72462  | -1 | 6.17E-50 |
| 96  | 106441 | P | 96  | 232725 | 0  | 3.27E-48 |
| 96  | 177382 | P | 96  | 232725 | 0  | 3.27E-48 |
| 95  | 39338  | F | 95  | 232725 | 0  | 1.31E-47 |
| 92  | 55093  | F | 92  | 255547 | 0  | 8.38E-46 |

---

---

|    |        |   |    |        |    |          |
|----|--------|---|----|--------|----|----------|
| 92 | 146029 | F | 92 | 270211 | 0  | 8.38E-46 |
| 91 | 167429 | P | 91 | 270211 | 0  | 3.35E-45 |
| 90 | 72415  | F | 90 | 214325 | 0  | 1.34E-44 |
| 90 | 98702  | F | 90 | 214369 | 0  | 1.34E-44 |
| 89 | 98704  | F | 89 | 270215 | 0  | 5.36E-44 |
| 88 | 10512  | P | 88 | 40238  | 0  | 2.15E-43 |
| 88 | 41502  | P | 88 | 84563  | 0  | 2.15E-43 |
| 88 | 98704  | F | 88 | 146033 | 0  | 2.15E-43 |
| 88 | 146033 | F | 88 | 214371 | 0  | 2.15E-43 |
| 88 | 214371 | F | 88 | 270215 | 0  | 2.15E-43 |
| 98 | 8706   | F | 98 | 228602 | -3 | 8.40E-43 |
| 98 | 52165  | P | 98 | 228602 | -3 | 8.40E-43 |
| 87 | 41503  | F | 87 | 72485  | 0  | 8.58E-43 |
| 87 | 72485  | P | 87 | 84563  | 0  | 8.58E-43 |
| 87 | 98704  | P | 87 | 167429 | 0  | 8.58E-43 |
| 87 | 167429 | P | 87 | 214371 | 0  | 8.58E-43 |
| 85 | 148316 | P | 85 | 169845 | 0  | 1.37E-41 |
| 82 | 10244  | F | 82 | 269341 | 0  | 8.79E-40 |
| 82 | 150082 | P | 82 | 254874 | 0  | 8.79E-40 |
| 82 | 215807 | F | 82 | 269341 | 0  | 8.79E-40 |
| 89 | 5743   | P | 89 | 41384  | -2 | 1.89E-39 |
| 85 | 72480  | P | 85 | 195418 | -1 | 3.50E-39 |
| 81 | 18856  | F | 81 | 72484  | 0  | 3.52E-39 |
| 81 | 18857  | P | 81 | 83105  | 0  | 3.52E-39 |
| 80 | 18857  | F | 80 | 41503  | 0  | 1.41E-38 |
| 80 | 18857  | P | 80 | 84570  | 0  | 1.41E-38 |
| 80 | 25104  | F | 80 | 56673  | 0  | 1.41E-38 |

---

---

|    |        |   |    |        |    |          |
|----|--------|---|----|--------|----|----------|
| 80 | 25104  | P | 80 | 84571  | 0  | 1.41E-38 |
| 80 | 41502  | F | 80 | 56673  | 0  | 1.41E-38 |
| 80 | 56673  | P | 80 | 83107  | 0  | 1.41E-38 |
| 80 | 72485  | P | 80 | 83106  | 0  | 1.41E-38 |
| 87 | 52176  | P | 87 | 228602 | -2 | 2.89E-38 |
| 79 | 18857  | F | 79 | 25105  | 0  | 5.62E-38 |
| 79 | 18857  | F | 79 | 56674  | 0  | 5.62E-38 |
| 79 | 18858  | P | 79 | 195418 | 0  | 5.62E-38 |
| 79 | 25105  | F | 79 | 72485  | 0  | 5.62E-38 |
| 79 | 41504  | P | 79 | 195418 | 0  | 5.62E-38 |
| 79 | 56674  | F | 79 | 72485  | 0  | 5.62E-38 |
| 79 | 83106  | F | 79 | 195418 | 0  | 5.62E-38 |
| 79 | 84570  | F | 79 | 195418 | 0  | 5.62E-38 |
| 82 | 8722   | F | 82 | 228618 | -1 | 2.16E-37 |
| 78 | 25106  | P | 78 | 195419 | 0  | 2.25E-37 |
| 78 | 56675  | P | 78 | 195419 | 0  | 2.25E-37 |
| 81 | 586    | F | 81 | 229300 | -1 | 8.54E-37 |
| 75 | 39326  | P | 75 | 214395 | 0  | 1.44E-35 |
| 75 | 83166  | F | 75 | 232768 | 0  | 1.44E-35 |
| 85 | 36411  | P | 85 | 269454 | -3 | 3.66E-35 |
| 78 | 180864 | F | 78 | 214394 | -1 | 5.26E-35 |
| 73 | 125035 | F | 73 | 160152 | 0  | 2.30E-34 |
| 82 | 7272   | F | 82 | 150208 | -3 | 2.10E-33 |
| 71 | 39330  | P | 71 | 180865 | 0  | 3.69E-33 |
| 71 | 106474 | F | 71 | 180865 | 0  | 3.69E-33 |
| 71 | 106474 | F | 71 | 214395 | 0  | 3.69E-33 |
| 71 | 177415 | F | 71 | 180865 | 0  | 3.69E-33 |

---



---

|    |        |   |    |        |    |          |
|----|--------|---|----|--------|----|----------|
| 71 | 177415 | F | 71 | 214395 | 0  | 3.69E-33 |
| 74 | 240247 | F | 74 | 245201 | -1 | 1.28E-32 |
| 70 | 195538 | F | 70 | 232779 | 0  | 1.47E-32 |
| 73 | 8121   | P | 73 | 38243  | -1 | 5.05E-32 |
| 72 | 13463  | F | 72 | 232716 | -1 | 1.99E-31 |
| 68 | 13468  | P | 68 | 180864 | 0  | 2.36E-31 |
| 68 | 13468  | P | 68 | 214394 | 0  | 2.36E-31 |
| 67 | 13468  | F | 67 | 39334  | 0  | 9.44E-31 |
| 67 | 13468  | P | 67 | 106474 | 0  | 9.44E-31 |
| 67 | 13468  | P | 67 | 177415 | 0  | 9.44E-31 |
| 66 | 13392  | F | 66 | 84505  | 0  | 3.77E-30 |
| 65 | 13471  | P | 65 | 98727  | 0  | 1.51E-29 |
| 65 | 13471  | P | 65 | 146056 | 0  | 1.51E-29 |
| 65 | 13471  | P | 65 | 270238 | 0  | 1.51E-29 |
| 65 | 98727  | F | 65 | 180864 | 0  | 1.51E-29 |
| 65 | 146056 | F | 65 | 180864 | 0  | 1.51E-29 |
| 65 | 167427 | F | 65 | 232723 | 0  | 1.51E-29 |
| 65 | 180864 | F | 65 | 270238 | 0  | 1.51E-29 |
| 68 | 82131  | P | 68 | 180313 | -1 | 4.81E-29 |
| 68 | 148268 | P | 68 | 204297 | -1 | 4.81E-29 |
| 64 | 13472  | F | 64 | 167429 | 0  | 6.04E-29 |
| 64 | 39337  | P | 64 | 98728  | 0  | 6.04E-29 |
| 64 | 39337  | P | 64 | 146057 | 0  | 6.04E-29 |
| 64 | 39337  | P | 64 | 270239 | 0  | 6.04E-29 |
| 64 | 43831  | P | 64 | 51382  | 0  | 6.04E-29 |
| 64 | 83177  | F | 64 | 195538 | 0  | 6.04E-29 |
| 64 | 98728  | F | 64 | 106474 | 0  | 6.04E-29 |

---

---

|    |        |   |    |        |    |          |
|----|--------|---|----|--------|----|----------|
| 64 | 98728  | F | 64 | 177415 | 0  | 6.04E-29 |
| 64 | 106474 | F | 64 | 146057 | 0  | 6.04E-29 |
| 64 | 106474 | F | 64 | 270239 | 0  | 6.04E-29 |
| 64 | 146057 | F | 64 | 177415 | 0  | 6.04E-29 |
| 64 | 167429 | P | 64 | 180864 | 0  | 6.04E-29 |
| 64 | 177415 | F | 64 | 270239 | 0  | 6.04E-29 |
| 71 | 7283   | F | 71 | 150219 | -2 | 8.24E-29 |
| 63 | 13376  | F | 63 | 56463  | 0  | 2.42E-28 |
| 63 | 13472  | F | 63 | 232725 | 0  | 2.42E-28 |
| 63 | 39338  | F | 63 | 167429 | 0  | 2.42E-28 |
| 63 | 98728  | P | 63 | 232725 | 0  | 2.42E-28 |
| 63 | 106474 | P | 63 | 167429 | 0  | 2.42E-28 |
| 63 | 146057 | P | 63 | 232725 | 0  | 2.42E-28 |
| 63 | 167429 | P | 63 | 177415 | 0  | 2.42E-28 |
| 63 | 180865 | P | 63 | 232725 | 0  | 2.42E-28 |
| 63 | 214395 | P | 63 | 232725 | 0  | 2.42E-28 |
| 63 | 232725 | P | 63 | 270239 | 0  | 2.42E-28 |
| 62 | 7563   | F | 62 | 7647   | 0  | 9.66E-28 |
| 61 | 72515  | P | 61 | 143806 | 0  | 3.86E-27 |
| 64 | 84630  | F | 64 | 232768 | -1 | 1.16E-26 |
| 60 | 4929   | F | 60 | 106556 | 0  | 1.55E-26 |
| 60 | 4929   | F | 60 | 177497 | 0  | 1.55E-26 |
| 60 | 39419  | P | 60 | 214323 | 0  | 1.55E-26 |
| 67 | 228245 | P | 67 | 248268 | -2 | 1.88E-26 |
| 62 | 56632  | P | 62 | 232768 | -1 | 1.80E-25 |
| 58 | 7296   | F | 58 | 150232 | 0  | 2.47E-25 |
| 58 | 39419  | P | 58 | 72415  | 0  | 2.47E-25 |

---

---

|    |        |   |    |        |    |          |
|----|--------|---|----|--------|----|----------|
| 68 | 179180 | F | 68 | 266188 | -3 | 3.19E-25 |
| 57 | 41533  | P | 57 | 143810 | 0  | 9.89E-25 |
| 57 | 83008  | P | 57 | 106572 | 0  | 9.89E-25 |
| 57 | 83008  | P | 57 | 177513 | 0  | 9.89E-25 |
| 57 | 84563  | F | 57 | 143810 | 0  | 9.89E-25 |
| 57 | 100274 | P | 57 | 253284 | 0  | 9.89E-25 |
| 56 | 106381 | P | 56 | 143872 | 0  | 3.96E-24 |
| 55 | 25070  | F | 55 | 106439 | 0  | 1.58E-23 |
| 62 | 891    | F | 62 | 150835 | -2 | 1.64E-23 |
| 65 | 39061  | P | 65 | 215613 | -3 | 1.78E-23 |
| 65 | 178600 | F | 65 | 265605 | -3 | 1.78E-23 |
| 65 | 227943 | P | 65 | 248563 | -3 | 1.78E-23 |
| 54 | 25071  | F | 54 | 177381 | 0  | 6.33E-23 |
| 57 | 8768   | F | 57 | 180165 | -1 | 1.69E-22 |
| 57 | 52144  | P | 57 | 180165 | -1 | 1.69E-22 |
| 53 | 25072  | P | 53 | 232768 | 0  | 2.53E-22 |
| 53 | 83166  | P | 53 | 106441 | 0  | 2.53E-22 |
| 53 | 83166  | P | 53 | 177382 | 0  | 2.53E-22 |
| 56 | 67370  | F | 56 | 227533 | -1 | 6.65E-22 |
| 62 | 56610  | P | 62 | 232790 | -3 | 9.87E-22 |
| 52 | 25073  | P | 52 | 39381  | 0  | 1.01E-21 |
| 52 | 39381  | F | 52 | 83166  | 0  | 1.01E-21 |
| 55 | 41571  | F | 55 | 55413  | -1 | 2.61E-21 |
| 60 | 114115 | P | 60 | 251355 | -3 | 1.43E-20 |
| 50 | 18887  | P | 50 | 143817 | 0  | 1.62E-20 |
| 50 | 39381  | P | 50 | 41473  | 0  | 1.62E-20 |
| 50 | 41473  | F | 50 | 106444 | 0  | 1.62E-20 |

---

---

|    |        |   |    |        |    |          |
|----|--------|---|----|--------|----|----------|
| 50 | 41473  | F | 50 | 177385 | 0  | 1.62E-20 |
| 50 | 41473  | P | 50 | 232768 | 0  | 1.62E-20 |
| 50 | 83106  | F | 50 | 143817 | 0  | 1.62E-20 |
| 50 | 143817 | F | 50 | 195418 | 0  | 1.62E-20 |
| 53 | 56641  | F | 53 | 106441 | -1 | 4.03E-20 |
| 53 | 56641  | F | 53 | 177382 | -1 | 4.03E-20 |
| 53 | 84630  | P | 53 | 106441 | -1 | 4.03E-20 |
| 53 | 84630  | P | 53 | 177382 | -1 | 4.03E-20 |
| 53 | 84641  | F | 53 | 195538 | -1 | 4.03E-20 |
| 59 | 56613  | P | 59 | 195549 | -3 | 5.43E-20 |
| 56 | 227952 | P | 56 | 248563 | -2 | 5.49E-20 |
| 49 | 7215   | F | 49 | 150156 | 0  | 6.48E-20 |
| 49 | 12997  | P | 49 | 235903 | 0  | 6.48E-20 |
| 49 | 25075  | F | 49 | 234243 | 0  | 6.48E-20 |
| 49 | 25135  | P | 49 | 143818 | 0  | 6.48E-20 |
| 49 | 39382  | P | 49 | 234243 | 0  | 6.48E-20 |
| 49 | 41473  | F | 49 | 234243 | 0  | 6.48E-20 |
| 49 | 56704  | P | 49 | 143818 | 0  | 6.48E-20 |
| 49 | 83167  | P | 49 | 234243 | 0  | 6.48E-20 |
| 49 | 106444 | F | 49 | 234243 | 0  | 6.48E-20 |
| 49 | 177385 | F | 49 | 234243 | 0  | 6.48E-20 |
| 49 | 232769 | P | 49 | 234243 | 0  | 6.48E-20 |
| 52 | 39381  | P | 52 | 56642  | -1 | 1.58E-19 |
| 52 | 39381  | F | 52 | 84630  | -1 | 1.58E-19 |
| 51 | 56632  | P | 51 | 195538 | -1 | 6.20E-19 |
| 57 | 97392  | F | 57 | 180841 | -3 | 7.82E-19 |
| 47 | 56479  | F | 47 | 84505  | 0  | 1.04E-18 |

---

---

|    |        |   |    |        |    |          |
|----|--------|---|----|--------|----|----------|
| 50 | 36442  | P | 50 | 269458 | -1 | 2.43E-18 |
| 50 | 64644  | P | 50 | 100142 | -1 | 2.43E-18 |
| 50 | 105227 | P | 50 | 269458 | -1 | 2.43E-18 |
| 56 | 100341 | P | 56 | 121266 | -3 | 2.96E-18 |
| 56 | 100341 | P | 56 | 227348 | -3 | 2.96E-18 |
| 53 | 39663  | F | 53 | 234459 | -2 | 3.14E-18 |
| 46 | 72459  | F | 46 | 98702  | 0  | 4.15E-18 |
| 46 | 84537  | P | 46 | 106617 | 0  | 4.15E-18 |
| 49 | 56644  | F | 49 | 234243 | -1 | 9.53E-18 |
| 49 | 84631  | P | 49 | 234243 | -1 | 9.53E-18 |
| 49 | 117129 | F | 49 | 191027 | -1 | 9.53E-18 |
| 52 | 13514  | P | 52 | 106383 | -2 | 1.21E-17 |
| 52 | 13514  | F | 52 | 143874 | -2 | 1.21E-17 |
| 51 | 39075  | P | 51 | 215613 | -2 | 4.65E-17 |
| 44 | 4945   | P | 44 | 83021  | 0  | 6.64E-17 |
| 44 | 72461  | F | 44 | 146033 | 0  | 6.64E-17 |
| 44 | 72461  | P | 44 | 167472 | 0  | 6.64E-17 |
| 44 | 72461  | F | 44 | 270215 | 0  | 6.64E-17 |
| 44 | 212935 | P | 44 | 214300 | 0  | 6.64E-17 |
| 47 | 39192  | P | 47 | 215534 | -1 | 1.46E-16 |
| 53 | 67453  | F | 53 | 227616 | -3 | 1.60E-16 |
| 53 | 110376 | P | 53 | 262122 | -3 | 1.60E-16 |
| 52 | 137089 | F | 52 | 250904 | -3 | 6.05E-16 |
| 42 | 25072  | P | 42 | 195538 | 0  | 1.06E-15 |
| 42 | 83188  | F | 42 | 84652  | 0  | 1.06E-15 |
| 42 | 84652  | F | 42 | 195549 | 0  | 1.06E-15 |
| 42 | 84652  | F | 42 | 232790 | 0  | 1.06E-15 |

---

---

|    |        |   |    |        |    |          |
|----|--------|---|----|--------|----|----------|
| 42 | 96557  | F | 42 | 106734 | 0  | 1.06E-15 |
| 42 | 106441 | P | 42 | 195538 | 0  | 1.06E-15 |
| 42 | 177382 | P | 42 | 195538 | 0  | 1.06E-15 |
| 45 | 56936  | P | 45 | 81353  | -1 | 2.24E-15 |
| 51 | 64264  | P | 51 | 83275  | -3 | 2.28E-15 |
| 48 | 43530  | P | 48 | 253169 | -2 | 2.63E-15 |
| 41 | 39392  | F | 41 | 195538 | 0  | 4.25E-15 |
| 41 | 215629 | F | 41 | 262848 | 0  | 4.25E-15 |
| 50 | 8654   | F | 50 | 9712   | -3 | 8.58E-15 |
| 50 | 9712   | P | 50 | 52265  | -3 | 8.58E-15 |
| 47 | 117331 | F | 47 | 119555 | -2 | 1.01E-14 |
| 47 | 177734 | P | 47 | 191037 | -2 | 1.01E-14 |
| 43 | 18834  | F | 43 | 98705  | -1 | 3.43E-14 |
| 43 | 18834  | F | 43 | 146034 | -1 | 3.43E-14 |
| 43 | 18834  | P | 43 | 167472 | -1 | 3.43E-14 |
| 43 | 18834  | F | 43 | 214372 | -1 | 3.43E-14 |
| 43 | 18834  | F | 43 | 270216 | -1 | 3.43E-14 |
| 43 | 94539  | P | 43 | 180841 | -1 | 3.43E-14 |
| 39 | 41473  | P | 39 | 195538 | 0  | 6.80E-14 |
| 39 | 55203  | F | 39 | 255677 | 0  | 6.80E-14 |
| 39 | 64655  | P | 39 | 100142 | 0  | 6.80E-14 |
| 39 | 110390 | P | 39 | 262122 | 0  | 6.80E-14 |
| 39 | 195538 | P | 39 | 234243 | 0  | 6.80E-14 |
| 48 | 91261  | P | 48 | 184136 | -3 | 1.21E-13 |
| 48 | 91261  | F | 48 | 270124 | -3 | 1.21E-13 |
| 45 | 77971  | P | 45 | 204285 | -2 | 1.48E-13 |
| 47 | 72459  | F | 47 | 98641  | -3 | 4.54E-13 |

---

---

|    |        |   |    |        |    |          |
|----|--------|---|----|--------|----|----------|
| 47 | 227802 | P | 47 | 248716 | -3 | 4.54E-13 |
| 41 | 65290  | F | 41 | 65302  | -1 | 5.23E-13 |
| 44 | 18834  | F | 44 | 98644  | -2 | 5.65E-13 |
| 46 | 98641  | F | 46 | 98702  | -3 | 1.70E-12 |
| 46 | 98641  | F | 46 | 214369 | -3 | 1.70E-12 |
| 46 | 103299 | F | 46 | 163354 | -3 | 1.70E-12 |
| 40 | 39086  | P | 40 | 215613 | -1 | 2.04E-12 |
| 36 | 44     | F | 36 | 8666   | 0  | 4.35E-12 |
| 36 | 44     | P | 36 | 52267  | 0  | 4.35E-12 |
| 36 | 180950 | F | 36 | 262093 | 0  | 4.35E-12 |
| 45 | 97637  | P | 45 | 269442 | -3 | 6.36E-12 |
| 45 | 112367 | P | 45 | 124371 | -3 | 6.36E-12 |
| 39 | 8665   | P | 39 | 42766  | -1 | 7.96E-12 |
| 39 | 42766  | F | 39 | 52265  | -1 | 7.96E-12 |
| 39 | 86805  | F | 39 | 151438 | -1 | 7.96E-12 |
| 39 | 115911 | P | 39 | 115911 | -1 | 7.96E-12 |
| 42 | 43339  | F | 42 | 148294 | -2 | 8.23E-12 |
| 42 | 43339  | P | 42 | 204297 | -2 | 8.23E-12 |
| 35 | 41564  | F | 35 | 106519 | 0  | 1.74E-11 |
| 35 | 41564  | F | 35 | 177460 | 0  | 1.74E-11 |
| 44 | 41441  | F | 44 | 270183 | -3 | 2.37E-11 |
| 44 | 67434  | F | 44 | 227597 | -3 | 2.37E-11 |
| 44 | 98643  | F | 44 | 146033 | -3 | 2.37E-11 |
| 44 | 98643  | P | 44 | 167472 | -3 | 2.37E-11 |
| 44 | 98643  | F | 44 | 270215 | -3 | 2.37E-11 |
| 38 | 5718   | P | 38 | 13663  | -1 | 3.10E-11 |
| 38 | 34804  | P | 38 | 178281 | -1 | 3.10E-11 |

---

---

|    |        |   |    |        |    |          |
|----|--------|---|----|--------|----|----------|
| 38 | 57592  | P | 38 | 83217  | -1 | 3.10E-11 |
| 38 | 117139 | P | 38 | 177743 | -1 | 3.10E-11 |
| 38 | 215269 | P | 38 | 239920 | -1 | 3.10E-11 |
| 41 | 39069  | P | 41 | 262848 | -2 | 3.14E-11 |
| 41 | 106118 | F | 41 | 191963 | -2 | 3.14E-11 |
| 41 | 148276 | P | 41 | 264814 | -2 | 3.14E-11 |
| 41 | 204316 | F | 41 | 264814 | -2 | 3.14E-11 |
| 34 | 0      | F | 34 | 98793  | 0  | 6.96E-11 |
| 34 | 13424  | P | 34 | 106629 | 0  | 6.96E-11 |
| 34 | 227974 | P | 34 | 248563 | 0  | 6.96E-11 |
| 43 | 228043 | P | 43 | 248485 | -3 | 8.85E-11 |
| 40 | 91554  | P | 40 | 223635 | -2 | 1.19E-10 |
| 40 | 100357 | P | 40 | 121266 | -2 | 1.19E-10 |
| 40 | 100357 | P | 40 | 227348 | -2 | 1.19E-10 |
| 37 | 100494 | P | 37 | 163303 | -1 | 1.21E-10 |
| 33 | 67393  | F | 33 | 227556 | 0  | 2.78E-10 |
| 33 | 148346 | P | 33 | 204264 | 0  | 2.78E-10 |
| 33 | 169867 | F | 33 | 204264 | 0  | 2.78E-10 |
| 33 | 179207 | F | 33 | 266215 | 0  | 2.78E-10 |
| 33 | 218280 | P | 33 | 263408 | 0  | 2.78E-10 |
| 42 | 100322 | P | 42 | 227381 | -3 | 3.29E-10 |
| 39 | 114136 | P | 39 | 251355 | -2 | 4.53E-10 |
| 36 | 44     | F | 36 | 9724   | -1 | 4.70E-10 |
| 36 | 44     | P | 36 | 42768  | -1 | 4.70E-10 |
| 36 | 121609 | F | 36 | 227022 | -1 | 4.70E-10 |
| 32 | 64423  | P | 32 | 148422 | 0  | 1.11E-09 |
| 32 | 148422 | P | 32 | 213242 | 0  | 1.11E-09 |

---



---

|    |        |   |    |        |    |          |
|----|--------|---|----|--------|----|----------|
| 32 | 184147 | F | 32 | 195578 | 0  | 1.11E-09 |
| 32 | 195578 | P | 32 | 270129 | 0  | 1.11E-09 |
| 41 | 8535   | F | 41 | 228525 | -3 | 1.22E-09 |
| 41 | 52397  | P | 41 | 228521 | -3 | 1.22E-09 |
| 35 | 6944   | P | 35 | 100259 | -1 | 1.83E-09 |
| 35 | 13611  | F | 35 | 72413  | -1 | 1.83E-09 |
| 35 | 125003 | F | 35 | 160111 | -1 | 1.83E-09 |
| 31 | 25169  | F | 31 | 113654 | 0  | 4.46E-09 |
| 31 | 72546  | F | 31 | 214440 | 0  | 4.46E-09 |
| 31 | 82205  | P | 31 | 180282 | 0  | 4.46E-09 |
| 31 | 84652  | P | 31 | 106441 | 0  | 4.46E-09 |
| 31 | 84652  | P | 31 | 177382 | 0  | 4.46E-09 |
| 31 | 101256 | P | 31 | 262114 | 0  | 4.46E-09 |
| 31 | 134456 | F | 31 | 171498 | 0  | 4.46E-09 |
| 40 | 75776  | P | 40 | 150861 | -3 | 4.53E-09 |
| 40 | 77950  | F | 40 | 148284 | -3 | 4.53E-09 |
| 40 | 77950  | P | 40 | 204309 | -3 | 4.53E-09 |
| 37 | 13609  | F | 37 | 214321 | -2 | 6.52E-09 |
| 37 | 64278  | P | 37 | 83275  | -2 | 6.52E-09 |
| 37 | 67379  | F | 37 | 160114 | -2 | 6.52E-09 |
| 37 | 98658  | F | 37 | 98719  | -2 | 6.52E-09 |
| 37 | 98658  | F | 37 | 146048 | -2 | 6.52E-09 |
| 37 | 98658  | P | 37 | 167464 | -2 | 6.52E-09 |
| 37 | 98658  | F | 37 | 214386 | -2 | 6.52E-09 |
| 37 | 98658  | F | 37 | 270230 | -2 | 6.52E-09 |
| 37 | 134398 | P | 37 | 148149 | -2 | 6.52E-09 |
| 37 | 157785 | P | 37 | 253050 | -2 | 6.52E-09 |

---

---

|    |        |   |    |        |    |          |
|----|--------|---|----|--------|----|----------|
| 37 | 205335 | P | 37 | 260509 | -2 | 6.52E-09 |
| 34 | 37434  | F | 34 | 37491  | -1 | 7.10E-09 |
| 34 | 77970  | P | 34 | 169910 | -1 | 7.10E-09 |
| 34 | 143934 | P | 34 | 167414 | -1 | 7.10E-09 |
| 39 | 72681  | F | 39 | 232822 | -3 | 1.68E-08 |
| 39 | 91259  | P | 39 | 232819 | -3 | 1.68E-08 |
| 30 | 5489   | P | 30 | 36139  | 0  | 1.78E-08 |
| 30 | 8708   | P | 30 | 105660 | 0  | 1.78E-08 |
| 30 | 18848  | F | 30 | 98658  | 0  | 1.78E-08 |
| 30 | 32441  | P | 30 | 218082 | 0  | 1.78E-08 |
| 30 | 39326  | P | 30 | 72546  | 0  | 1.78E-08 |
| 30 | 39326  | F | 30 | 143806 | 0  | 1.78E-08 |
| 30 | 39403  | P | 30 | 56642  | 0  | 1.78E-08 |
| 30 | 39403  | F | 30 | 84652  | 0  | 1.78E-08 |
| 30 | 41592  | F | 30 | 143939 | 0  | 1.78E-08 |
| 30 | 52231  | F | 30 | 105660 | 0  | 1.78E-08 |
| 30 | 56951  | P | 30 | 81353  | 0  | 1.78E-08 |
| 30 | 67948  | P | 30 | 106928 | 0  | 1.78E-08 |
| 30 | 101256 | F | 30 | 154355 | 0  | 1.78E-08 |
| 30 | 143806 | P | 30 | 214440 | 0  | 1.78E-08 |
| 30 | 154355 | P | 30 | 262115 | 0  | 1.78E-08 |
| 30 | 163457 | P | 30 | 247055 | 0  | 1.78E-08 |
| 30 | 184147 | F | 30 | 232819 | 0  | 1.78E-08 |
| 30 | 231307 | F | 30 | 232494 | 0  | 1.78E-08 |
| 30 | 232819 | P | 30 | 270131 | 0  | 1.78E-08 |
| 36 | 3420   | P | 36 | 3420   | -2 | 2.47E-08 |
| 36 | 14560  | F | 36 | 226717 | -2 | 2.47E-08 |

---

---

|    |        |   |    |        |    |          |
|----|--------|---|----|--------|----|----------|
| 36 | 180165 | F | 36 | 228664 | -2 | 2.47E-08 |
| 33 | 920    | F | 33 | 150864 | -1 | 2.76E-08 |
| 33 | 4950   | F | 33 | 121087 | -1 | 2.76E-08 |
| 33 | 13613  | P | 33 | 39444  | -1 | 2.76E-08 |
| 33 | 36463  | F | 33 | 97637  | -1 | 2.76E-08 |
| 33 | 39127  | P | 33 | 215580 | -1 | 2.76E-08 |
| 33 | 83027  | P | 33 | 121087 | -1 | 2.76E-08 |
| 33 | 97637  | F | 33 | 105248 | -1 | 2.76E-08 |
| 33 | 106577 | F | 33 | 121087 | -1 | 2.76E-08 |
| 33 | 121087 | F | 33 | 177518 | -1 | 2.76E-08 |
| 33 | 180590 | P | 33 | 180590 | -1 | 2.76E-08 |
| 38 | 7601   | F | 38 | 7643   | -3 | 6.19E-08 |
| 38 | 13502  | P | 38 | 97411  | -3 | 6.19E-08 |
| 38 | 27214  | P | 38 | 150284 | -3 | 6.19E-08 |
| 38 | 36422  | F | 38 | 97595  | -3 | 6.19E-08 |
| 38 | 40387  | F | 38 | 247047 | -3 | 6.19E-08 |
| 38 | 57602  | P | 38 | 184137 | -3 | 6.19E-08 |
| 38 | 57602  | F | 38 | 270133 | -3 | 6.19E-08 |
| 38 | 97595  | F | 38 | 105207 | -3 | 6.19E-08 |
| 38 | 98657  | F | 38 | 180855 | -3 | 6.19E-08 |
| 38 | 113888 | P | 38 | 251598 | -3 | 6.19E-08 |
| 35 | 8624   | P | 35 | 42805  | -2 | 9.32E-08 |
| 35 | 42805  | F | 35 | 52310  | -2 | 9.32E-08 |
| 35 | 56608  | F | 35 | 91263  | -2 | 9.32E-08 |
| 35 | 74983  | F | 35 | 258871 | -2 | 9.32E-08 |
| 35 | 179317 | F | 35 | 266326 | -2 | 9.32E-08 |
| 32 | 8768   | F | 32 | 266763 | -1 | 1.07E-07 |

---

---

|    |        |   |    |        |    |          |
|----|--------|---|----|--------|----|----------|
| 32 | 8831   | F | 32 | 68602  | -1 | 1.07E-07 |
| 32 | 28512  | P | 32 | 91257  | -1 | 1.07E-07 |
| 32 | 52106  | P | 32 | 68602  | -1 | 1.07E-07 |
| 32 | 52169  | P | 32 | 266763 | -1 | 1.07E-07 |
| 32 | 72575  | F | 32 | 82349  | -1 | 1.07E-07 |
| 32 | 100365 | P | 32 | 121266 | -1 | 1.07E-07 |
| 32 | 100365 | P | 32 | 227348 | -1 | 1.07E-07 |
| 32 | 180165 | F | 32 | 266763 | -1 | 1.07E-07 |
| 32 | 214089 | P | 32 | 241371 | -1 | 1.07E-07 |
| 37 | 16996  | F | 37 | 174082 | -3 | 2.28E-07 |
| 37 | 57606  | P | 37 | 72665  | -3 | 2.28E-07 |
| 37 | 94539  | P | 37 | 97398  | -3 | 2.28E-07 |
| 37 | 160114 | F | 37 | 227542 | -3 | 2.28E-07 |
| 34 | 7563   | F | 34 | 7605   | -2 | 3.52E-07 |
| 34 | 97415  | F | 34 | 98727  | -2 | 3.52E-07 |
| 34 | 97415  | F | 34 | 146056 | -2 | 3.52E-07 |
| 34 | 97415  | P | 34 | 167459 | -2 | 3.52E-07 |
| 34 | 97415  | F | 34 | 214394 | -2 | 3.52E-07 |
| 34 | 97415  | F | 34 | 270238 | -2 | 3.52E-07 |
| 34 | 228388 | P | 34 | 248158 | -2 | 3.52E-07 |
| 31 | 39031  | P | 31 | 215671 | -1 | 4.14E-07 |
| 31 | 72546  | F | 31 | 180910 | -1 | 4.14E-07 |
| 31 | 151437 | P | 31 | 238895 | -1 | 4.14E-07 |
| 36 | 43405  | F | 36 | 78003  | -3 | 8.39E-07 |
| 36 | 57594  | P | 36 | 232819 | -3 | 8.39E-07 |
| 36 | 72677  | F | 36 | 149326 | -3 | 8.39E-07 |
| 36 | 157709 | P | 36 | 223543 | -3 | 8.39E-07 |

---

---

|    |        |   |    |        |    |          |
|----|--------|---|----|--------|----|----------|
| 36 | 179845 | F | 36 | 266488 | -3 | 8.39E-07 |
| 33 | 8557   | P | 33 | 42861  | -2 | 1.32E-06 |
| 33 | 39368  | P | 33 | 97416  | -2 | 1.32E-06 |
| 33 | 42861  | F | 33 | 52379  | -2 | 1.32E-06 |
| 33 | 64484  | F | 33 | 204251 | -2 | 1.32E-06 |
| 33 | 67317  | P | 33 | 245845 | -2 | 1.32E-06 |
| 33 | 77950  | P | 33 | 264814 | -2 | 1.32E-06 |
| 33 | 77971  | F | 33 | 148303 | -2 | 1.32E-06 |
| 33 | 97416  | F | 33 | 106474 | -2 | 1.32E-06 |
| 33 | 97416  | F | 33 | 177415 | -2 | 1.32E-06 |
| 33 | 97416  | P | 33 | 232755 | -2 | 1.32E-06 |
| 33 | 98893  | F | 33 | 260814 | -2 | 1.32E-06 |
| 33 | 148422 | F | 33 | 249936 | -2 | 1.32E-06 |
| 33 | 197535 | F | 33 | 238889 | -2 | 1.32E-06 |
| 33 | 204251 | F | 33 | 213303 | -2 | 1.32E-06 |
| 33 | 204251 | P | 33 | 249874 | -2 | 1.32E-06 |
| 30 | 5745   | F | 30 | 184095 | -1 | 1.60E-06 |
| 30 | 40933  | F | 30 | 258877 | -1 | 1.60E-06 |
| 30 | 41441  | P | 30 | 184095 | -1 | 1.60E-06 |
| 30 | 55433  | F | 30 | 143938 | -1 | 1.60E-06 |
| 30 | 72476  | F | 30 | 98658  | -1 | 1.60E-06 |
| 30 | 82343  | P | 30 | 98608  | -1 | 1.60E-06 |
| 30 | 84652  | P | 30 | 234241 | -1 | 1.60E-06 |
| 30 | 101258 | F | 30 | 124849 | -1 | 1.60E-06 |
| 30 | 124846 | F | 30 | 154354 | -1 | 1.60E-06 |
| 30 | 132031 | F | 30 | 196821 | -1 | 1.60E-06 |
| 30 | 143806 | P | 30 | 180910 | -1 | 1.60E-06 |

---

---

|    |        |   |    |        |    |          |
|----|--------|---|----|--------|----|----------|
| 30 | 178782 | F | 30 | 265785 | -1 | 1.60E-06 |
| 30 | 180018 | F | 30 | 266663 | -1 | 1.60E-06 |
| 30 | 218316 | P | 30 | 263375 | -1 | 1.60E-06 |
| 30 | 227487 | P | 30 | 245845 | -1 | 1.60E-06 |
| 30 | 268123 | P | 30 | 268830 | -1 | 1.60E-06 |
| 35 | 94549  | P | 35 | 97390  | -3 | 3.08E-06 |
| 35 | 112580 | P | 35 | 124168 | -3 | 3.08E-06 |
| 35 | 115649 | F | 35 | 115689 | -3 | 3.08E-06 |
| 35 | 179325 | F | 35 | 266334 | -3 | 3.08E-06 |
| 35 | 228291 | P | 35 | 248254 | -3 | 3.08E-06 |
| 32 | 41592  | P | 32 | 167411 | -2 | 4.97E-06 |
| 32 | 55434  | P | 32 | 167411 | -2 | 4.97E-06 |
| 32 | 67379  | F | 32 | 125006 | -2 | 4.97E-06 |
| 32 | 67474  | F | 32 | 227637 | -2 | 4.97E-06 |
| 32 | 72546  | F | 32 | 106519 | -2 | 4.97E-06 |
| 32 | 72546  | F | 32 | 177460 | -2 | 4.97E-06 |
| 32 | 72681  | F | 32 | 184150 | -2 | 4.97E-06 |
| 32 | 72681  | P | 32 | 270126 | -2 | 4.97E-06 |
| 32 | 78555  | P | 32 | 79736  | -2 | 4.97E-06 |
| 32 | 82988  | F | 32 | 167409 | -2 | 4.97E-06 |
| 32 | 228054 | P | 32 | 248485 | -2 | 4.97E-06 |
| 32 | 228664 | F | 32 | 266763 | -2 | 4.97E-06 |
| 34 | 66024  | P | 34 | 191964 | -3 | 1.12E-05 |
| 34 | 94539  | P | 34 | 98652  | -3 | 1.12E-05 |
| 31 | 5744   | P | 31 | 270183 | -2 | 1.86E-05 |
| 31 | 39448  | F | 31 | 167518 | -2 | 1.86E-05 |
| 31 | 41354  | P | 31 | 68030  | -2 | 1.86E-05 |

---

---

|    |        |   |    |        |    |          |
|----|--------|---|----|--------|----|----------|
| 31 | 41564  | F | 31 | 180910 | -2 | 1.86E-05 |
| 31 | 41564  | F | 31 | 214440 | -2 | 1.86E-05 |
| 31 | 124849 | P | 31 | 262112 | -2 | 1.86E-05 |
| 31 | 167384 | F | 31 | 191057 | -2 | 1.86E-05 |
| 31 | 167518 | P | 31 | 214323 | -2 | 1.86E-05 |
| 31 | 197923 | F | 31 | 260793 | -2 | 1.86E-05 |
| 31 | 250296 | F | 31 | 250523 | -2 | 1.86E-05 |
| 31 | 250435 | F | 31 | 250567 | -2 | 1.86E-05 |
| 33 | 28476  | F | 33 | 184120 | -3 | 4.10E-05 |
| 33 | 28476  | P | 33 | 270155 | -3 | 4.10E-05 |
| 33 | 43348  | F | 33 | 77971  | -3 | 4.10E-05 |
| 33 | 149327 | F | 33 | 232819 | -3 | 4.10E-05 |
| 33 | 168105 | F | 33 | 212953 | -3 | 4.10E-05 |
| 33 | 169910 | F | 33 | 204297 | -3 | 4.10E-05 |
| 33 | 179811 | F | 33 | 266454 | -3 | 4.10E-05 |
| 33 | 228029 | P | 33 | 248509 | -3 | 4.10E-05 |
| 30 | 4957   | F | 30 | 191059 | -2 | 6.98E-05 |
| 30 | 13507  | P | 30 | 98665  | -2 | 6.98E-05 |
| 30 | 27472  | F | 30 | 145606 | -2 | 6.98E-05 |
| 30 | 39326  | P | 30 | 41564  | -2 | 6.98E-05 |
| 30 | 41594  | P | 30 | 82990  | -2 | 6.98E-05 |
| 30 | 42777  | F | 30 | 52276  | -2 | 6.98E-05 |
| 30 | 55413  | F | 30 | 106526 | -2 | 6.98E-05 |
| 30 | 55413  | F | 30 | 177467 | -2 | 6.98E-05 |
| 30 | 57600  | P | 30 | 195578 | -2 | 6.98E-05 |
| 30 | 64223  | P | 30 | 83343  | -2 | 6.98E-05 |
| 30 | 65290  | F | 30 | 65314  | -2 | 6.98E-05 |

---

---

|    |        |   |    |        |    |          |
|----|--------|---|----|--------|----|----------|
| 30 | 72678  | F | 30 | 195578 | -2 | 6.98E-05 |
| 30 | 75786  | P | 30 | 150861 | -2 | 6.98E-05 |
| 30 | 82992  | P | 30 | 143939 | -2 | 6.98E-05 |
| 30 | 83023  | P | 30 | 191059 | -2 | 6.98E-05 |
| 30 | 86805  | P | 30 | 238895 | -2 | 6.98E-05 |
| 30 | 91268  | P | 30 | 195578 | -2 | 6.98E-05 |
| 30 | 97421  | F | 30 | 180870 | -2 | 6.98E-05 |
| 30 | 98666  | F | 30 | 98727  | -2 | 6.98E-05 |
| 30 | 98666  | F | 30 | 146056 | -2 | 6.98E-05 |
| 30 | 98666  | P | 30 | 167463 | -2 | 6.98E-05 |
| 30 | 98666  | F | 30 | 214394 | -2 | 6.98E-05 |
| 30 | 98666  | F | 30 | 270238 | -2 | 6.98E-05 |
| 30 | 105660 | P | 30 | 228604 | -2 | 6.98E-05 |
| 30 | 106519 | P | 30 | 143806 | -2 | 6.98E-05 |
| 30 | 106584 | F | 30 | 191059 | -2 | 6.98E-05 |
| 30 | 140320 | F | 30 | 215176 | -2 | 6.98E-05 |
| 30 | 143806 | P | 30 | 177460 | -2 | 6.98E-05 |
| 30 | 168105 | P | 30 | 214296 | -2 | 6.98E-05 |
| 30 | 177525 | F | 30 | 191059 | -2 | 6.98E-05 |
| 32 | 46782  | F | 32 | 221509 | -3 | 1.49E-04 |
| 32 | 49679  | P | 32 | 60178  | -3 | 1.49E-04 |
| 32 | 72681  | P | 32 | 91263  | -3 | 1.49E-04 |
| 32 | 98831  | P | 32 | 121668 | -3 | 1.49E-04 |
| 32 | 106120 | F | 32 | 259914 | -3 | 1.49E-04 |
| 32 | 114062 | P | 32 | 251438 | -3 | 1.49E-04 |
| 32 | 125006 | F | 32 | 227542 | -3 | 1.49E-04 |
| 32 | 178636 | F | 32 | 265641 | -3 | 1.49E-04 |

---



---

|    |        |   |    |        |    |          |
|----|--------|---|----|--------|----|----------|
| 32 | 228168 | P | 32 | 248377 | -3 | 1.49E-04 |
| 32 | 228318 | P | 32 | 248230 | -3 | 1.49E-04 |
| 31 | 922    | P | 31 | 75780  | -3 | 5.41E-04 |
| 31 | 25166  | P | 31 | 167416 | -3 | 5.41E-04 |
| 31 | 30488  | F | 31 | 184297 | -3 | 5.41E-04 |
| 31 | 43416  | P | 31 | 64494  | -3 | 5.41E-04 |
| 31 | 43416  | P | 31 | 213313 | -3 | 5.41E-04 |
| 31 | 43416  | F | 31 | 249866 | -3 | 5.41E-04 |
| 31 | 47190  | F | 31 | 221920 | -3 | 5.41E-04 |
| 31 | 55439  | P | 31 | 82986  | -3 | 5.41E-04 |
| 31 | 56457  | F | 31 | 187511 | -3 | 5.41E-04 |
| 31 | 57603  | P | 31 | 83213  | -3 | 5.41E-04 |
| 31 | 72413  | P | 31 | 167518 | -3 | 5.41E-04 |
| 31 | 80040  | P | 31 | 161680 | -3 | 5.41E-04 |
| 31 | 91650  | F | 31 | 223914 | -3 | 5.41E-04 |
| 31 | 113599 | F | 31 | 184080 | -3 | 5.41E-04 |
| 31 | 143869 | P | 31 | 180860 | -3 | 5.41E-04 |
| 30 | 8549   | F | 30 | 228539 | -3 | 1.95E-03 |
| 30 | 13373  | F | 30 | 187514 | -3 | 1.95E-03 |
| 30 | 13691  | F | 30 | 179609 | -3 | 1.95E-03 |
| 30 | 18848  | F | 30 | 180856 | -3 | 1.95E-03 |
| 30 | 20651  | P | 30 | 205076 | -3 | 1.95E-03 |
| 30 | 23385  | F | 30 | 81844  | -3 | 1.95E-03 |
| 30 | 26332  | P | 30 | 134459 | -3 | 1.95E-03 |
| 30 | 28512  | F | 30 | 149336 | -3 | 1.95E-03 |
| 30 | 28512  | F | 30 | 232828 | -3 | 1.95E-03 |
| 30 | 28516  | P | 30 | 56600  | -3 | 1.95E-03 |

---

---

|    |        |   |    |        |    |          |
|----|--------|---|----|--------|----|----------|
| 30 | 29304  | P | 30 | 231491 | -3 | 1.95E-03 |
| 30 | 36361  | F | 30 | 105134 | -3 | 1.95E-03 |
| 30 | 36361  | P | 30 | 269571 | -3 | 1.95E-03 |
| 30 | 36422  | P | 30 | 170581 | -3 | 1.95E-03 |
| 30 | 39373  | P | 30 | 98665  | -3 | 1.95E-03 |
| 30 | 39448  | P | 30 | 146001 | -3 | 1.95E-03 |
| 30 | 56613  | P | 30 | 184147 | -3 | 1.95E-03 |
| 30 | 56613  | F | 30 | 270131 | -3 | 1.95E-03 |
| 30 | 56804  | P | 30 | 210687 | -3 | 1.95E-03 |
| 30 | 57606  | F | 30 | 91274  | -3 | 1.95E-03 |
| 30 | 57606  | P | 30 | 149321 | -3 | 1.95E-03 |
| 30 | 66356  | P | 30 | 76578  | -3 | 1.95E-03 |
| 30 | 67320  | F | 30 | 227487 | -3 | 1.95E-03 |
| 30 | 72407  | F | 30 | 234310 | -3 | 1.95E-03 |
| 30 | 72415  | F | 30 | 146002 | -3 | 1.95E-03 |
| 30 | 83217  | F | 30 | 184147 | -3 | 1.95E-03 |
| 30 | 83217  | P | 30 | 270131 | -3 | 1.95E-03 |
| 30 | 84562  | P | 30 | 180907 | -3 | 1.95E-03 |
| 30 | 91281  | P | 30 | 184134 | -3 | 1.95E-03 |
| 30 | 91281  | F | 30 | 270144 | -3 | 1.95E-03 |
| 30 | 96518  | P | 30 | 99955  | -3 | 1.95E-03 |
| 30 | 97414  | F | 30 | 98665  | -3 | 1.95E-03 |
| 30 | 98667  | F | 30 | 106474 | -3 | 1.95E-03 |
| 30 | 98667  | F | 30 | 177415 | -3 | 1.95E-03 |
| 30 | 98667  | P | 30 | 232758 | -3 | 1.95E-03 |
| 30 | 105207 | P | 30 | 170581 | -3 | 1.95E-03 |
| 30 | 106409 | F | 30 | 180860 | -3 | 1.95E-03 |

---

---

|    |        |   |    |        |    |          |
|----|--------|---|----|--------|----|----------|
| 30 | 112540 | P | 30 | 124213 | -3 | 1.95E-03 |
| 30 | 134361 | F | 30 | 217295 | -3 | 1.95E-03 |
| 30 | 134426 | F | 30 | 171461 | -3 | 1.95E-03 |
| 30 | 137225 | F | 30 | 251089 | -3 | 1.95E-03 |
| 30 | 141211 | F | 30 | 141687 | -3 | 1.95E-03 |
| 30 | 146002 | F | 30 | 214325 | -3 | 1.95E-03 |
| 30 | 149327 | F | 30 | 184147 | -3 | 1.95E-03 |
| 30 | 149327 | F | 30 | 195578 | -3 | 1.95E-03 |
| 30 | 149327 | P | 30 | 270131 | -3 | 1.95E-03 |
| 30 | 157534 | F | 30 | 157592 | -3 | 1.95E-03 |
| 30 | 170582 | F | 30 | 269499 | -3 | 1.95E-03 |
| 30 | 178296 | F | 30 | 265342 | -3 | 1.95E-03 |
| 30 | 179823 | F | 30 | 266466 | -3 | 1.95E-03 |
| 30 | 220218 | F | 30 | 220355 | -3 | 1.95E-03 |
| 30 | 228069 | P | 30 | 248472 | -3 | 1.95E-03 |
| 30 | 228177 | P | 30 | 248370 | -3 | 1.95E-03 |
| 30 | 234314 | P | 30 | 262147 | -3 | 1.95E-03 |

---

11

12

13 **Table S4 The DNA transfer in the mitochondrial genome of *I. batatas***

| Number | identities | length | start | end   | start | end   | evaluate | mitogene               |
|--------|------------|--------|-------|-------|-------|-------|----------|------------------------|
| 1      | 80.863     | 371    | 68116 | 68477 | 55849 | 56202 | 4.98E-71 | trnW-CCA               |
| 2      | 79.688     | 192    | 46648 | 46837 | 56763 | 56945 | 8.82E-29 | IGS(trnW-CCA-ccmFc)    |
| 3      | 100        | 28     | 8133  | 8160  | 56832 | 56805 | 5.46E-06 | IGS(trnW-CCA-ccmFc)    |
| 4      | 96.61      | 59     | 31944 | 32002 | 68740 | 68682 | 6.92E-20 | IGS(rps12-nad7)        |
| 5      | 91.447     | 152    | 35917 | 36063 | 10195 | 10210 | 1.43E-51 | IGS(trnK-UUU-matR)     |
| 6      | 96.375     | 331    | 399   | 729   | 10476 | 10508 | 7.4E-154 | IGS(trnK-UUU-matR)     |
| 7      | 89.764     | 127    | 31416 | 31542 | 11104 | 11091 | 8.7E-39  | trnD-GUC               |
| 8      | 99.769     | 1299   | 14034 | 14163 | 11158 | 11288 | 0        | IGS(trnD-GUC-trnE-UUC) |
| 9      | 96.88      | 3462   | 42340 | 45763 | 11712 | 11368 | 0        | IGS(trnD-GUC-trnE-UUC) |
| 10     | 80.992     | 121    | 39831 | 39951 | 11745 | 11733 | 2.49E-19 | IGS(trnD-GUC-trnE-UUC) |

|    |        |      |       |       |       |       |       |            |
|----|--------|------|-------|-------|-------|-------|-------|------------|
| 11 | 80.992 | 121  | 42055 | 42175 | 11967 | 11955 | 2.49E | IGS(trnD-  |
|    |        |      |       |       | 6     | 6     | -19   | GUC-trnE-  |
|    |        |      |       |       |       |       |       | UUC)       |
| 12 | 99.216 | 2935 | 39398 | 42332 | 12010 | 11719 | 0     | IGS(trnD-  |
|    |        |      |       |       | 9     | 4     |       | GUC-trnE-  |
|    |        |      |       |       |       |       |       | UUC)       |
| 13 | 88.852 | 305  | 36884 | 37187 | 12037 | 12009 | 1.34E | IGS(trnD-  |
|    |        |      |       |       | 9     | 8     | -96   | GUC-trnE-  |
|    |        |      |       |       |       |       |       | UUC)       |
| 14 | 91.31  | 1473 | 81313 | 82756 | 15438 | 15583 | 0     | IGS(rpl16- |
|    |        |      |       |       | 2     | 2     |       | mttB)      |
| 15 | 92.839 | 1173 | 82756 | 83906 | 15578 | 15694 | 0     | IGS(rpl16- |
|    |        |      |       |       | 0     | 1     |       | mttB)      |
| 16 | 99.636 | 549  | 10024 | 10079 | 16810 | 16755 | 0     | IGS(mttB-  |
|    |        |      | 6     | 4     | 5     | 7     |       | nad4L)     |
| 17 | 74.074 | 891  | 14656 | 14742 | 17940 | 17854 | 2.27E | rrn18      |
|    |        |      | 0     | 3     | 2     | 3     | -84   |            |
| 18 | 93.59  | 78   | 53994 | 54071 | 19722 | 19715 | 1.91E | trnM-CAU   |
|    |        |      |       |       | 7     | 0     | -25   |            |
| 19 | 96.296 | 54   | 84943 | 84996 | 24043 | 24038 | 4.16E | IGS(rps4-  |
|    |        |      |       |       | 7     | 4     | -17   | atp6)      |
| 20 | 84.534 | 944  | 90885 | 91812 | 24128 | 24220 | 0     | IGS(rps4-  |
|    |        |      |       |       | 2     | 9     |       | atp6)      |
| 21 | 82.799 | 593  | 92235 | 92818 | 24274 | 24331 | 3.5E- | IGS(rps4-  |
|    |        |      |       |       | 2     | 5     | 142   | atp6)      |
| 22 | 90.402 | 1021 | 15485 | 15586 | 24481 | 24380 | 0     | IGS(rps4-  |
|    |        |      | 4     | 0     | 0     | 2     |       | atp6)      |
| 23 | 96.61  | 118  | 59840 | 59957 | 24572 | 24584 | 2.38E | atp6       |

---

|    |        |      |       |       |       |       |       |                        |
|----|--------|------|-------|-------|-------|-------|-------|------------------------|
|    |        |      |       |       | 9     | 6     | -49   |                        |
| 24 | 94.471 | 416  | 55658 | 56067 | 24573 | 24531 | 0     | IGS(rps4-<br>atp6)     |
|    |        |      |       |       | 1     | 6     |       |                        |
| 25 | 96.296 | 81   | 10950 | 10958 | 26140 | 26148 | 1.9E- | trnN-GUU               |
|    |        |      | 1     | 1     | 1     | 1     | 30    |                        |
| 26 | 99.245 | 2912 | 14500 | 14790 | 26797 | 26506 | 0     | IGS(trnN-<br>GUU-nad5) |
|    |        |      | 6     | 2     | 9     | 9     |       |                        |

---

14

15

16

17 **Table S5 The RNA editing events prediction in the *I. batatas*.**

| gene | Position | Coverage | Reference | Editing efficiency | Edited number | Alternative |
|------|----------|----------|-----------|--------------------|---------------|-------------|
| atp1 | 1039     | 414      | C         | 0.9806             | 406           | U           |
| atp1 | 1244     | 448      | C         | 0.029              | 13            | U           |
| atp1 | 1247     | 462      | C         | 0.0735             | 34            | U           |
| atp1 | 1253     | 464      | A         | 0.028              | 13            | G           |
| atp1 | 1414     | 727      | C         | 0.2819             | 205           | U           |
| atp1 | 1489     | 708      | C         | 0.0169             | 12            | U           |
| atp1 | 1490     | 675      | C         | 0.9614             | 649           | U           |
| atp4 | 50       | 53       | C         | 0.9622             | 51            | U           |
| atp4 | 62       | 49       | C         | 0.9183             | 45            | U           |
| atp4 | 109      | 59       | C         | 0.8983             | 53            | U           |
| atp4 | 206      | 106      | C         | 0.9433             | 100           | U           |
| atp4 | 218      | 105      | C         | 0.9428             | 99            | U           |
| atp4 | 219      | 106      | C         | 0.1132             | 12            | U           |
| atp4 | 239      | 114      | C         | 0.9736             | 111           | U           |
| atp4 | 242      | 114      | C         | 0.9824             | 112           | U           |
| atp4 | 297      | 125      | C         | 0.144              | 18            | U           |
| atp4 | 386      | 145      | C         | 0.9931             | 144           | U           |
| atp4 | 398      | 145      | C         | 0.9931             | 144           | U           |
| atp6 | 27       | 40       | C         | 0.375              | 15            | A           |
| atp6 | 29       | 36       | C         | 0.3055             | 11            | A           |
| atp6 | 454      | 31       | C         | 1                  | 31            | U           |
| atp6 | 533      | 45       | C         | 0.9111             | 41            | U           |
| atp6 | 584      | 50       | C         | 0.88               | 44            | U           |
| atp6 | 590      | 50       | C         | 0.9                | 44            | U           |
| atp6 | 641      | 52       | C         | 0.8653             | 45            | U           |
| atp6 | 653      | 54       | C         | 0.8888             | 48            | U           |
| atp6 | 671      | 54       | C         | 0.9074             | 49            | U           |
| atp6 | 679      | 54       | C         | 0.9444             | 51            | U           |
| atp6 | 686      | 50       | C         | 0.96               | 48            | U           |
| atp6 | 687      | 50       | C         | 0.64               | 32            | U           |
| atp6 | 877      | 30       | C         | 0.8666             | 26            | U           |
| atp6 | 880      | 30       | C         | 1                  | 30            | U           |
| atp6 | 902      | 34       | C         | 0.9117             | 31            | U           |
| atp6 | 944      | 26       | C         | 1                  | 26            | U           |
| atp6 | 1073     | 21       | C         | 0.9523             | 20            | U           |
| atp6 | 1081     | 21       | C         | 1                  | 21            | U           |
| atp6 | 1088     | 22       | C         | 0.9545             | 21            | U           |
| atp6 | 1095     | 22       | C         | 0.6363             | 14            | U           |
| atp6 | 1097     | 22       | C         | 0.9545             | 21            | U           |

---

|      |      |      |   |        |      |   |
|------|------|------|---|--------|------|---|
| atp6 | 1135 | 25   | C | 0.88   | 22   | U |
| atp8 | 39   | 294  | C | 0.0544 | 16   | U |
| atp8 | 47   | 296  | C | 0.7736 | 229  | U |
| atp8 | 58   | 318  | C | 0.5377 | 171  | U |
| atp8 | 76   | 319  | C | 0.5454 | 174  | U |
| atp8 | 165  | 458  | C | 0.0458 | 21   | U |
| atp8 | 219  | 403  | C | 0.4143 | 167  | U |
| atp8 | 449  | 222  | C | 0.7657 | 170  | U |
| atp9 | 20   | 2834 | C | 0.9844 | 2789 | U |
| atp9 | 50   | 2626 | C | 0.9904 | 2601 | U |
| atp9 | 57   | 2570 | A | 0.0077 | 10   | G |
| atp9 | 60   | 2540 | T | 0.007  | 15   | A |
| atp9 | 64   | 2589 | G | 0.0065 | 16   | A |
| atp9 | 70   | 2569 | A | 0.0062 | 16   | C |
| atp9 | 78   | 2740 | C | 0.0062 | 17   | U |
| atp9 | 81   | 2605 | C | 0.9696 | 2525 | U |
| atp9 | 82   | 2608 | C | 0.9846 | 2568 | U |
| atp9 | 90   | 2756 | C | 0.169  | 466  | U |
| atp9 | 92   | 2798 | C | 0.9853 | 2757 | U |
| atp9 | 97   | 2844 | C | 0.0295 | 84   | U |
| atp9 | 104  | 2641 | T | 0.0098 | 22   | G |
| atp9 | 106  | 2261 | G | 0.0044 | 10   | A |
| atp9 | 182  | 2114 | C | 0.9952 | 2104 | U |
| atp9 | 190  | 2051 | C | 0.0258 | 53   | U |
| atp9 | 191  | 1956 | C | 0.9867 | 1924 | U |
| atp9 | 202  | 1758 | T | 0.0113 | 10   | C |
| atp9 | 212  | 1714 | C | 0.9889 | 1695 | U |
| atp9 | 216  | 1705 | C | 0.0381 | 65   | U |
| atp9 | 223  | 1697 | C | 0.9811 | 1664 | U |
| atp9 | 227  | 1679 | C | 0.0119 | 20   | U |
| atp9 | 241  | 1344 | A | 0.0252 | 33   | G |
| atp9 | 251  | 838  | T | 0.0381 | 27   | G |
| ccmB | 304  | 18   | C | 0.7777 | 14   | U |
| ccmB | 424  | 15   | C | 0.6666 | 10   | U |
| ccmB | 428  | 15   | C | 0.6666 | 10   | U |
| ccmB | 467  | 25   | C | 0.56   | 14   | U |
| ccmB | 485  | 28   | C | 0.6428 | 18   | U |
| ccmB | 494  | 28   | C | 0.5357 | 15   | U |
| ccmB | 503  | 28   | C | 0.5714 | 16   | U |
| ccmB | 512  | 27   | C | 0.5555 | 15   | U |
| ccmB | 514  | 26   | C | 0.5769 | 15   | U |
| ccmB | 551  | 31   | C | 0.5483 | 17   | U |

---



---

|       |     |     |   |        |     |   |
|-------|-----|-----|---|--------|-----|---|
| ccmB  | 554 | 30  | C | 0.5333 | 16  | U |
| ccmB  | 566 | 31  | C | 0.5483 | 17  | U |
| ccmB  | 569 | 29  | C | 0.5172 | 15  | U |
| ccmB  | 572 | 30  | C | 0.5333 | 16  | U |
| ccmB  | 576 | 30  | C | 0.3666 | 11  | U |
| ccmC  | 76  | 27  | C | 0.9259 | 25  | U |
| ccmC  | 84  | 31  | C | 0.3225 | 10  | U |
| ccmC  | 103 | 31  | C | 0.8387 | 26  | U |
| ccmC  | 115 | 32  | C | 0.875  | 28  | U |
| ccmC  | 133 | 31  | C | 0.9677 | 30  | U |
| ccmC  | 179 | 36  | C | 0.8888 | 32  | U |
| ccmC  | 184 | 31  | C | 0.9354 | 29  | U |
| ccmC  | 299 | 20  | C | 0.95   | 19  | U |
| ccmC  | 399 | 94  | C | 0.7021 | 66  | U |
| ccmC  | 400 | 94  | C | 0.6808 | 64  | U |
| ccmC  | 418 | 80  | C | 0.1374 | 11  | U |
| ccmC  | 421 | 104 | C | 1      | 104 | U |
| ccmC  | 436 | 115 | C | 0.9913 | 114 | U |
| ccmC  | 446 | 120 | C | 0.9833 | 118 | U |
| ccmC  | 451 | 123 | C | 0.9674 | 119 | U |
| ccmC  | 458 | 131 | C | 0.9465 | 124 | U |
| ccmC  | 463 | 136 | C | 0.9411 | 128 | U |
| ccmC  | 467 | 135 | C | 0.9333 | 126 | U |
| ccmC  | 473 | 143 | C | 0.944  | 134 | U |
| ccmC  | 477 | 148 | C | 0.1689 | 25  | U |
| ccmC  | 497 | 151 | C | 0.9536 | 144 | U |
| ccmC  | 548 | 131 | C | 0.9389 | 123 | U |
| ccmC  | 568 | 143 | C | 0.93   | 133 | U |
| ccmC  | 575 | 139 | C | 0.9208 | 128 | U |
| ccmC  | 605 | 97  | C | 0.9484 | 92  | U |
| ccmC  | 606 | 98  | C | 0.6326 | 62  | U |
| ccmC  | 607 | 99  | C | 0.1111 | 11  | U |
| ccmC  | 608 | 97  | C | 0.969  | 94  | U |
| ccmC  | 614 | 100 | C | 0.95   | 95  | U |
| ccmC  | 618 | 99  | C | 0.5656 | 56  | U |
| ccmC  | 619 | 100 | C | 0.96   | 96  | U |
| ccmC  | 624 | 98  | C | 0.9387 | 92  | U |
| ccmC  | 650 | 75  | C | 0.9333 | 70  | U |
| ccmC  | 655 | 72  | C | 0.1805 | 13  | U |
| ccmC  | 656 | 72  | C | 0.9166 | 66  | U |
| ccmC  | 673 | 60  | C | 0.85   | 51  | U |
| ccmFc | 29  | 122 | C | 0.2786 | 31  | U |

---

---

|       |      |     |   |        |    |   |
|-------|------|-----|---|--------|----|---|
| ccmFc | 62   | 157 | C | 0.2292 | 36 | A |
| ccmFc | 72   | 157 | C | 0.4076 | 64 | U |
| ccmFc | 74   | 156 | C | 0.2948 | 46 | U |
| ccmFc | 125  | 129 | C | 0.5658 | 73 | U |
| ccmFc | 144  | 118 | C | 0.5932 | 70 | U |
| ccmFc | 168  | 115 | C | 0.7217 | 83 | U |
| ccmFc | 173  | 101 | C | 0.7722 | 78 | U |
| ccmFc | 177  | 103 | C | 0.4563 | 47 | U |
| ccmFc | 413  | 65  | C | 0.8    | 52 | U |
| ccmFc | 448  | 281 | C | 0.0355 | 10 | U |
| ccmFc | 905  | 31  | C | 0.5806 | 18 | U |
| ccmFc | 935  | 32  | C | 0.5937 | 19 | U |
| ccmFn | 38   | 35  | C | 0.5142 | 18 | U |
| ccmFn | 98   | 27  | C | 0.5925 | 16 | U |
| ccmFn | 137  | 23  | C | 0.7391 | 17 | U |
| ccmFn | 142  | 23  | C | 0.7826 | 18 | U |
| ccmFn | 151  | 25  | C | 0.64   | 16 | U |
| ccmFn | 248  | 16  | C | 0.6875 | 11 | U |
| ccmFn | 256  | 14  | C | 0.7142 | 10 | U |
| ccmFn | 365  | 14  | C | 0.8571 | 12 | U |
| ccmFn | 372  | 14  | C | 0.7857 | 11 | U |
| ccmFn | 767  | 20  | C | 0.95   | 19 | U |
| ccmFn | 779  | 21  | C | 0.9523 | 20 | U |
| ccmFn | 794  | 22  | C | 0.8181 | 18 | U |
| ccmFn | 943  | 16  | C | 0.8125 | 13 | U |
| ccmFn | 1261 | 11  | C | 0.909  | 10 | U |
| ccmFn | 1289 | 11  | C | 0.909  | 10 | U |
| ccmFn | 1321 | 12  | C | 0.8333 | 10 | U |
| ccmFn | 1390 | 12  | C | 0.8333 | 10 | U |
| ccmFn | 1433 | 12  | C | 0.8333 | 10 | U |
| ccmFn | 1457 | 15  | C | 0.8    | 12 | U |
| ccmFn | 1469 | 15  | C | 0.8    | 12 | U |
| ccmFn | 1504 | 13  | C | 0.7692 | 10 | U |
| cob   | 298  | 61  | C | 0.9836 | 60 | U |
| cob   | 325  | 68  | C | 0.9264 | 63 | U |
| cob   | 568  | 44  | C | 0.8636 | 38 | U |
| cob   | 680  | 33  | C | 0.9696 | 32 | U |
| cob   | 808  | 43  | C | 0.9302 | 40 | U |
| cob   | 908  | 37  | C | 0.8378 | 31 | U |
| cob   | 982  | 58  | C | 0.862  | 50 | U |
| cob   | 1084 | 104 | C | 0.9134 | 95 | U |
| cob   | 1160 | 78  | C | 0.2948 | 23 | U |

---

---

|      |      |     |   |        |     |   |
|------|------|-----|---|--------|-----|---|
| cox1 | 11   | 136 | C | 0.8676 | 118 | U |
| cox1 | 15   | 137 | C | 0.2773 | 38  | U |
| cox1 | 242  | 89  | C | 0.9325 | 83  | U |
| cox1 | 254  | 83  | C | 0.8795 | 73  | U |
| cox1 | 265  | 78  | C | 0.2564 | 20  | U |
| cox1 | 352  | 68  | C | 0.8235 | 56  | U |
| cox1 | 443  | 102 | C | 0.8725 | 89  | U |
| cox1 | 452  | 98  | C | 0.9387 | 92  | U |
| cox1 | 551  | 137 | C | 0.9854 | 135 | U |
| cox1 | 590  | 126 | C | 0.9523 | 120 | U |
| cox1 | 668  | 81  | C | 0.9012 | 72  | U |
| cox1 | 715  | 95  | C | 0.9684 | 92  | U |
| cox1 | 1186 | 90  | C | 0.9444 | 85  | U |
| cox1 | 1405 | 101 | C | 0.9108 | 92  | U |
| cox1 | 1433 | 91  | C | 0.912  | 83  | U |
| cox1 | 1489 | 91  | C | 0.8791 | 80  | U |
| cox1 | 1499 | 81  | C | 0.8765 | 71  | U |
| cox2 | 37   | 118 | C | 0.9152 | 108 | U |
| cox2 | 38   | 116 | C | 0.862  | 100 | U |
| cox2 | 71   | 98  | C | 1      | 98  | U |
| cox2 | 138  | 86  | C | 0.1395 | 12  | U |
| cox2 | 161  | 91  | C | 0.978  | 89  | U |
| cox2 | 253  | 103 | C | 0.9708 | 100 | U |
| cox2 | 278  | 123 | C | 0.9268 | 114 | U |
| cox2 | 379  | 115 | C | 0.9478 | 109 | U |
| cox2 | 383  | 111 | G | 0.9459 | 105 | C |
| cox2 | 443  | 150 | C | 0.98   | 147 | U |
| cox2 | 461  | 172 | C | 0.9709 | 167 | U |
| cox2 | 476  | 170 | C | 0.947  | 161 | U |
| cox2 | 557  | 235 | C | 0.9872 | 231 | U |
| cox2 | 574  | 223 | C | 0.0807 | 18  | U |
| cox2 | 632  | 199 | C | 0.9698 | 193 | U |
| cox2 | 666  | 174 | C | 0.2011 | 35  | U |
| cox2 | 742  | 138 | C | 0.9202 | 127 | U |
| cox3 | 245  | 283 | C | 0.9328 | 264 | U |
| cox3 | 298  | 321 | C | 0.894  | 286 | U |
| cox3 | 304  | 314 | C | 0.8375 | 260 | U |
| cox3 | 311  | 232 | C | 0.875  | 203 | U |
| cox3 | 314  | 236 | C | 0.8432 | 199 | U |
| cox3 | 419  | 208 | C | 0.9615 | 200 | U |
| cox3 | 422  | 211 | C | 0.872  | 184 | U |
| cox3 | 512  | 233 | C | 0.8841 | 206 | U |

---

---

|      |      |      |   |        |      |   |
|------|------|------|---|--------|------|---|
| cox3 | 653  | 153  | C | 0.9738 | 149  | U |
| cox3 | 702  | 196  | T | 0.153  | 30   | C |
| cox3 | 749  | 1859 | T | 0.9338 | 1733 | G |
| cox3 | 754  | 1616 | C | 0.9622 | 1555 | U |
| cox3 | 762  | 1626 | C | 0.0067 | 11   | U |
| cox3 | 764  | 1616 | C | 0.6875 | 1111 | U |
| cox3 | 776  | 155  | T | 0.4774 | 74   | G |
| matR | 193  | 62   | C | 0.8709 | 54   | U |
| matR | 235  | 58   | C | 0.8965 | 52   | U |
| matR | 236  | 58   | C | 0.3275 | 19   | U |
| matR | 326  | 50   | C | 0.6799 | 34   | U |
| matR | 413  | 48   | C | 0.9375 | 45   | U |
| matR | 1545 | 47   | C | 0.4255 | 20   | U |
| matR | 1679 | 63   | C | 0.8095 | 51   | U |
| matR | 1700 | 68   | C | 0.8235 | 56   | U |
| matR | 1720 | 69   | C | 0.8985 | 62   | U |
| matR | 1734 | 73   | C | 0.8904 | 65   | U |
| matR | 1787 | 63   | C | 0.9206 | 58   | U |
| matR | 1844 | 44   | C | 0.8636 | 38   | U |
| mttB | 431  | 12   | C | 0.8333 | 10   | U |
| nad1 | 215  | 27   | C | 0.9629 | 26   | U |
| nad1 | 265  | 26   | C | 0.8461 | 22   | U |
| nad1 | 307  | 24   | C | 0.8333 | 20   | U |
| nad1 | 308  | 24   | C | 0.8333 | 20   | U |
| nad1 | 436  | 51   | C | 0.5294 | 27   | U |
| nad1 | 492  | 32   | C | 0.5937 | 19   | U |
| nad1 | 493  | 36   | C | 0.8333 | 30   | U |
| nad1 | 500  | 39   | C | 0.641  | 25   | U |
| nad1 | 536  | 39   | C | 0.7179 | 28   | U |
| nad1 | 580  | 47   | C | 0.8723 | 41   | U |
| nad1 | 635  | 52   | C | 0.9615 | 50   | U |
| nad1 | 674  | 28   | C | 0.9285 | 26   | U |
| nad1 | 734  | 15   | C | 0.6666 | 10   | U |
| nad1 | 740  | 15   | C | 0.7333 | 11   | U |
| nad1 | 755  | 16   | C | 0.9375 | 15   | U |
| nad1 | 779  | 19   | C | 0.7368 | 14   | U |
| nad1 | 898  | 16   | C | 1      | 16   | U |
| nad1 | 928  | 19   | C | 0.9473 | 18   | U |
| nad1 | 937  | 20   | C | 0.95   | 19   | U |
| nad2 | 223  | 13   | C | 0.8461 | 11   | U |
| nad2 | 252  | 17   | C | 0.5882 | 10   | U |
| nad2 | 308  | 24   | C | 0.875  | 21   | U |

---

---

|      |      |     |   |        |     |   |
|------|------|-----|---|--------|-----|---|
| nad2 | 341  | 22  | C | 0.8636 | 19  | U |
| nad2 | 356  | 23  | C | 0.6956 | 16  | U |
| nad2 | 361  | 23  | C | 0.7391 | 17  | U |
| nad2 | 367  | 22  | C | 0.9545 | 21  | U |
| nad2 | 401  | 20  | C | 0.95   | 19  | U |
| nad2 | 428  | 16  | C | 0.9375 | 15  | U |
| nad2 | 497  | 18  | C | 0.8333 | 15  | U |
| nad2 | 523  | 13  | C | 0.7692 | 10  | U |
| nad2 | 668  | 18  | C | 0.6666 | 12  | U |
| nad2 | 788  | 22  | C | 0.6363 | 14  | U |
| nad2 | 800  | 22  | C | 0.5909 | 13  | U |
| nad2 | 809  | 23  | C | 0.5217 | 12  | U |
| nad2 | 928  | 15  | C | 0.6666 | 10  | U |
| nad2 | 958  | 13  | C | 0.8461 | 11  | U |
| nad2 | 962  | 15  | C | 0.7333 | 11  | U |
| nad2 | 1028 | 24  | C | 0.5    | 12  | U |
| nad2 | 1246 | 31  | C | 0.8709 | 27  | U |
| nad2 | 1247 | 30  | C | 0.8666 | 26  | U |
| nad2 | 1276 | 38  | C | 0.8684 | 33  | U |
| nad2 | 1298 | 48  | C | 0.8541 | 41  | U |
| nad2 | 1400 | 69  | C | 0.971  | 67  | U |
| nad2 | 1404 | 70  | C | 0.1571 | 11  | U |
| nad2 | 1408 | 70  | C | 0.9857 | 69  | U |
| nad2 | 1409 | 70  | C | 0.9714 | 68  | U |
| nad2 | 1457 | 51  | C | 1      | 51  | U |
| nad3 | 5    | 36  | C | 0.4166 | 15  | U |
| nad3 | 39   | 150 | C | 0.1266 | 19  | U |
| nad3 | 44   | 145 | C | 0.8137 | 118 | U |
| nad3 | 61   | 150 | C | 0.6733 | 101 | U |
| nad3 | 62   | 148 | C | 0.7364 | 109 | U |
| nad3 | 80   | 161 | C | 0.8322 | 134 | U |
| nad3 | 146  | 196 | C | 0.8979 | 176 | U |
| nad3 | 208  | 236 | C | 0.805  | 190 | U |
| nad3 | 209  | 234 | C | 0.8205 | 192 | U |
| nad3 | 215  | 246 | C | 0.8089 | 199 | U |
| nad3 | 230  | 250 | C | 0.856  | 214 | U |
| nad3 | 231  | 250 | C | 0.272  | 68  | U |
| nad3 | 266  | 220 | C | 0.8181 | 180 | U |
| nad3 | 275  | 230 | C | 0.8565 | 197 | U |
| nad3 | 317  | 189 | C | 0.8359 | 158 | U |
| nad3 | 344  | 166 | C | 0.771  | 128 | U |
| nad3 | 349  | 163 | C | 0.8098 | 132 | U |

---

---

|       |      |     |   |        |     |   |
|-------|------|-----|---|--------|-----|---|
| nad4  | 29   | 82  | C | 0.9268 | 76  | U |
| nad4  | 74   | 93  | C | 0.8387 | 78  | U |
| nad4  | 77   | 103 | C | 0.7669 | 79  | U |
| nad4  | 107  | 106 | C | 0.8773 | 92  | U |
| nad4  | 124  | 118 | C | 0.7627 | 90  | U |
| nad4  | 154  | 118 | C | 0.805  | 95  | U |
| nad4  | 158  | 119 | C | 0.8655 | 103 | U |
| nad4  | 197  | 105 | C | 0.8857 | 93  | U |
| nad4  | 362  | 88  | C | 0.4318 | 38  | U |
| nad4  | 368  | 73  | C | 0.9041 | 66  | U |
| nad4  | 376  | 74  | C | 0.9189 | 68  | U |
| nad4  | 433  | 69  | C | 0.6956 | 48  | U |
| nad4  | 436  | 69  | C | 0.9565 | 66  | U |
| nad4  | 437  | 68  | C | 0.8382 | 57  | U |
| nad4  | 608  | 125 | C | 0.952  | 119 | U |
| nad4  | 659  | 121 | C | 0.6859 | 83  | U |
| nad4  | 767  | 145 | C | 0.7448 | 108 | U |
| nad4  | 836  | 160 | C | 0.6625 | 106 | U |
| nad4  | 887  | 139 | C | 0.6187 | 86  | U |
| nad4  | 977  | 125 | C | 0.256  | 26  | U |
| nad4  | 1006 | 128 | C | 0.7421 | 95  | U |
| nad4  | 1009 | 130 | C | 0.2307 | 30  | U |
| nad4  | 1010 | 131 | C | 0.7786 | 102 | U |
| nad4  | 1016 | 135 | C | 0.6814 | 92  | U |
| nad4  | 1109 | 196 | C | 0.8265 | 162 | U |
| nad4  | 1129 | 184 | C | 0.7989 | 147 | U |
| nad4  | 1132 | 189 | C | 0.7777 | 147 | U |
| nad4  | 1148 | 187 | C | 0.7326 | 137 | U |
| nad4  | 1151 | 186 | C | 0.7634 | 142 | U |
| nad4  | 1152 | 185 | C | 0.1135 | 21  | U |
| nad4  | 1172 | 190 | C | 0.8368 | 159 | U |
| nad4  | 1194 | 188 | C | 0.0531 | 10  | U |
| nad4  | 1307 | 223 | C | 0.843  | 188 | U |
| nad4  | 1355 | 178 | C | 0.9775 | 174 | U |
| nad4  | 1373 | 164 | C | 0.8536 | 140 | U |
| nad4  | 1406 | 170 | C | 0.9117 | 155 | U |
| nad4  | 1418 | 178 | C | 0.8483 | 151 | U |
| nad4  | 1434 | 174 | C | 0.8793 | 153 | U |
| nad4  | 1439 | 164 | C | 0.8475 | 139 | U |
| nad4L | 86   | 13  | C | 0.8461 | 11  | U |
| nad4L | 95   | 13  | C | 0.923  | 12  | U |
| nad4L | 100  | 14  | C | 0.8571 | 12  | U |

---

---

|       |      |     |   |        |     |   |
|-------|------|-----|---|--------|-----|---|
| nad4L | 110  | 16  | C | 0.9375 | 15  | U |
| nad4L | 131  | 16  | C | 0.9375 | 15  | U |
| nad4L | 158  | 18  | C | 1      | 18  | U |
| nad4L | 179  | 22  | C | 1      | 22  | U |
| nad4L | 188  | 22  | C | 1      | 22  | U |
| nad4L | 197  | 22  | C | 1      | 22  | U |
| nad4L | 281  | 24  | C | 0.9583 | 23  | U |
| nad5  | 155  | 31  | C | 0.4838 | 15  | U |
| nad5  | 227  | 24  | C | 0.5    | 12  | U |
| nad5  | 229  | 23  | G | 0.5217 | 12  | U |
| nad5  | 242  | 25  | C | 0.92   | 23  | U |
| nad5  | 358  | 30  | C | 0.9333 | 28  | U |
| nad5  | 359  | 31  | C | 0.9677 | 30  | U |
| nad5  | 374  | 29  | C | 0.7241 | 21  | U |
| nad5  | 398  | 28  | C | 0.7857 | 22  | U |
| nad5  | 506  | 33  | C | 0.6363 | 21  | U |
| nad5  | 539  | 35  | C | 0.8857 | 31  | U |
| nad5  | 548  | 36  | C | 0.7222 | 26  | U |
| nad5  | 598  | 32  | C | 0.7812 | 25  | U |
| nad5  | 608  | 37  | C | 0.5405 | 20  | U |
| nad5  | 629  | 53  | C | 0.6037 | 32  | U |
| nad5  | 713  | 30  | C | 0.9    | 27  | U |
| nad5  | 725  | 28  | C | 0.8928 | 25  | U |
| nad5  | 835  | 25  | C | 1      | 25  | U |
| nad5  | 1310 | 31  | C | 0.4193 | 13  | U |
| nad5  | 1469 | 27  | C | 0.9629 | 26  | U |
| nad5  | 1529 | 33  | C | 0.8484 | 28  | U |
| nad5  | 1547 | 25  | C | 0.8    | 20  | U |
| nad5  | 1559 | 27  | C | 0.8888 | 24  | U |
| nad5  | 1568 | 33  | C | 0.7272 | 24  | U |
| nad5  | 1589 | 37  | C | 0.5945 | 22  | U |
| nad5  | 1874 | 28  | C | 0.9285 | 26  | U |
| nad5  | 1895 | 33  | C | 0.9393 | 31  | U |
| nad5  | 1897 | 32  | C | 0.9375 | 30  | U |
| nad5  | 1937 | 34  | C | 0.9117 | 31  | U |
| nad6  | 26   | 51  | C | 0.745  | 38  | U |
| nad6  | 88   | 65  | C | 0.8769 | 57  | U |
| nad6  | 89   | 65  | C | 0.8615 | 56  | U |
| nad6  | 95   | 70  | C | 0.8142 | 57  | U |
| nad6  | 103  | 67  | C | 0.8358 | 56  | U |
| nad6  | 161  | 68  | C | 0.8676 | 59  | U |
| nad6  | 569  | 325 | C | 0.9969 | 324 | U |

---

---

|       |      |     |   |        |    |   |
|-------|------|-----|---|--------|----|---|
| nad7  | 38   | 52  | C | 0.5    | 26 | U |
| nad7  | 45   | 54  | C | 0.3518 | 19 | U |
| nad7  | 77   | 66  | C | 0.7272 | 48 | U |
| nad7  | 83   | 65  | C | 0.5538 | 36 | U |
| nad7  | 137  | 45  | C | 0.6888 | 31 | U |
| nad7  | 200  | 28  | C | 0.8928 | 25 | U |
| nad7  | 244  | 44  | C | 0.75   | 33 | U |
| nad7  | 251  | 45  | C | 0.6    | 27 | U |
| nad7  | 315  | 48  | C | 0.2708 | 13 | U |
| nad7  | 316  | 49  | C | 0.8163 | 40 | U |
| nad7  | 335  | 53  | C | 0.7547 | 40 | U |
| nad7  | 344  | 54  | C | 0.5555 | 30 | U |
| nad7  | 383  | 48  | C | 0.8333 | 40 | U |
| nad7  | 578  | 51  | C | 0.8235 | 42 | U |
| nad7  | 724  | 29  | C | 0.8275 | 24 | U |
| nad7  | 739  | 22  | C | 0.5    | 11 | U |
| nad7  | 740  | 23  | C | 0.5217 | 12 | U |
| nad7  | 769  | 18  | C | 0.6666 | 12 | U |
| nad7  | 926  | 24  | C | 0.5416 | 13 | U |
| nad7  | 973  | 23  | C | 0.6956 | 16 | U |
| nad7  | 1050 | 30  | C | 0.5333 | 16 | U |
| nad7  | 1057 | 32  | C | 0.75   | 24 | U |
| nad7  | 1079 | 32  | C | 0.75   | 24 | U |
| nad7  | 1088 | 32  | C | 0.7187 | 23 | U |
| nad7  | 1103 | 41  | C | 0.7804 | 32 | U |
| nad7  | 1124 | 40  | C | 0.8    | 32 | U |
| nad7  | 1166 | 29  | C | 0.8965 | 26 | U |
| nad9  | 92   | 166 | C | 0.2469 | 41 | U |
| nad9  | 112  | 85  | C | 0.4    | 34 | U |
| nad9  | 167  | 125 | C | 0.272  | 34 | U |
| nad9  | 270  | 141 | C | 0.0851 | 12 | U |
| nad9  | 298  | 94  | C | 0.3191 | 30 | U |
| nad9  | 328  | 93  | C | 0.4623 | 43 | U |
| nad9  | 368  | 75  | C | 0.24   | 18 | U |
| nad9  | 398  | 68  | C | 0.7794 | 53 | U |
| nad9  | 439  | 57  | C | 0.3333 | 19 | U |
| rpl10 | 83   | 70  | C | 0.9    | 63 | U |
| rpl10 | 101  | 71  | C | 0.7183 | 51 | U |
| rpl10 | 133  | 219 | C | 0.1369 | 30 | U |
| rpl10 | 134  | 219 | C | 0.1826 | 40 | U |
| rpl10 | 180  | 74  | C | 0.1351 | 10 | U |
| rpl10 | 239  | 55  | C | 0.5818 | 32 | U |

---



---

|       |     |      |   |        |      |   |
|-------|-----|------|---|--------|------|---|
| rpl16 | 6   | 1136 | C | 1      | 1134 | U |
| rpl16 | 19  | 1874 | C | 0.017  | 32   | U |
| rpl16 | 35  | 2559 | C | 0.0293 | 75   | U |
| rpl16 | 37  | 2580 | C | 0.9922 | 2558 | U |
| rpl16 | 58  | 3392 | C | 0.005  | 17   | U |
| rpl16 | 92  | 4138 | C | 0.0043 | 17   | U |
| rpl16 | 97  | 4111 | C | 0.015  | 60   | U |
| rpl16 | 101 | 4203 | C | 0.0045 | 14   | U |
| rpl16 | 118 | 4592 | C | 0.0559 | 256  | U |
| rpl16 | 149 | 5047 | C | 0.0065 | 32   | U |
| rpl16 | 150 | 5076 | G | 0.0023 | 11   | A |
| rpl16 | 183 | 5968 | C | 0.0537 | 311  | U |
| rpl16 | 184 | 5942 | A | 0.0025 | 13   | G |
| rpl16 | 185 | 5782 | C | 0.998  | 5758 | U |
| rpl16 | 201 | 5831 | T | 0.0075 | 32   | C |
| rpl16 | 204 | 5812 | T | 0.0029 | 14   | C |
| rpl16 | 217 | 6031 | C | 0.0018 | 10   | U |
| rpl16 | 238 | 5686 | C | 0.0031 | 12   | U |
| rpl16 | 249 | 5716 | C | 0.3469 | 1981 | U |
| rpl16 | 258 | 5582 | C | 0.0073 | 41   | U |
| rpl16 | 262 | 5559 | C | 0.007  | 36   | U |
| rpl16 | 272 | 5474 | G | 0.0025 | 14   | A |
| rpl16 | 273 | 5480 | C | 0.0031 | 16   | U |
| rpl16 | 276 | 5408 | A | 0.0042 | 12   | C |
| rpl16 | 282 | 5499 | C | 0.0025 | 10   | U |
| rpl16 | 294 | 5469 | T | 0.004  | 17   | C |
| rpl16 | 315 | 5972 | C | 0.0051 | 30   | U |
| rpl16 | 321 | 5904 | T | 0.0016 | 10   | C |
| rpl16 | 324 | 5933 | C | 0.0716 | 425  | U |
| rpl16 | 325 | 5947 | C | 0.0052 | 28   | U |
| rpl16 | 326 | 5970 | C | 0.006  | 32   | U |
| rpl16 | 332 | 6127 | C | 0.0173 | 106  | U |
| rpl16 | 356 | 6091 | T | 0.0021 | 10   | C |
| rpl16 | 360 | 6231 | A | 0.0166 | 76   | G |
| rpl16 | 361 | 6294 | A | 0.0041 | 20   | G |
| rpl16 | 373 | 6413 | A | 0.0023 | 10   | G |
| rpl16 | 376 | 6409 | C | 0.002  | 12   | U |
| rpl16 | 377 | 6386 | C | 0.0081 | 51   | U |
| rpl16 | 402 | 6409 | C | 0.7178 | 4600 | U |
| rpl16 | 414 | 6457 | C | 0.0027 | 15   | U |
| rpl16 | 429 | 6213 | T | 0.0188 | 53   | C |
| rpl16 | 432 | 5789 | T | 0.0057 | 20   | C |

---

---

|       |     |      |   |        |      |   |
|-------|-----|------|---|--------|------|---|
| rpl16 | 450 | 5924 | T | 0.004  | 22   | C |
| rpl16 | 451 | 5975 | C | 0.0025 | 14   | U |
| rpl16 | 488 | 6138 | C | 0.9876 | 6062 | U |
| rpl16 | 491 | 6093 | C | 0.0114 | 68   | U |
| rpl16 | 495 | 6200 | C | 0.0432 | 265  | U |
| rpl16 | 505 | 6160 | C | 0.0873 | 537  | U |
| rpl16 | 511 | 5977 | T | 0.0026 | 12   | C |
| rpl5  | 35  | 41   | C | 0.8536 | 35   | U |
| rpl5  | 47  | 39   | C | 0.923  | 36   | U |
| rpl5  | 59  | 43   | C | 0.8604 | 37   | U |
| rpl5  | 64  | 42   | C | 0.8095 | 34   | U |
| rpl5  | 92  | 48   | C | 0.8958 | 43   | U |
| rpl5  | 161 | 38   | C | 0.9473 | 36   | U |
| rpl5  | 441 | 51   | C | 0.2549 | 13   | U |
| rpl5  | 509 | 34   | C | 0.8823 | 30   | U |
| rpl5  | 512 | 35   | C | 0.9714 | 34   | U |
| rps10 | 16  | 80   | C | 0.8625 | 68   | U |
| rps10 | 238 | 162  | C | 0.8703 | 141  | U |
| rps10 | 302 | 122  | C | 0.9016 | 110  | U |
| rps10 | 331 | 120  | C | 0.9    | 108  | U |
| rps12 | 25  | 270  | C | 0.2222 | 60   | U |
| rps12 | 84  | 364  | C | 0.0686 | 25   | U |
| rps12 | 102 | 360  | C | 0.1083 | 39   | U |
| rps12 | 103 | 361  | C | 0.2077 | 75   | U |
| rps12 | 104 | 359  | C | 0.9192 | 330  | U |
| rps12 | 146 | 367  | C | 0.9727 | 357  | U |
| rps12 | 196 | 349  | C | 0.957  | 334  | U |
| rps12 | 269 | 282  | C | 0.8439 | 238  | U |
| rps12 | 284 | 247  | C | 0.8623 | 213  | U |
| rps13 | 26  | 101  | C | 0.3366 | 34   | U |
| rps13 | 31  | 94   | T | 0.5744 | 54   | G |
| rps13 | 32  | 93   | C | 0.5698 | 53   | U |
| rps13 | 33  | 92   | C | 0.576  | 53   | A |
| rps13 | 34  | 91   | G | 0.5824 | 53   | A |
| rps13 | 38  | 94   | A | 0.5744 | 54   | C |
| rps13 | 50  | 106  | T | 0.6132 | 65   | G |
| rps13 | 56  | 111  | C | 0.1441 | 16   | U |
| rps13 | 57  | 112  | A | 0.625  | 70   | U |
| rps13 | 78  | 126  | A | 0.619  | 78   | C |
| rps13 | 83  | 125  | A | 0.592  | 74   | U |
| rps13 | 95  | 124  | A | 0.6048 | 75   | U |
| rps13 | 100 | 126  | C | 0.3571 | 45   | U |

---

---

|       |      |      |   |        |      |   |
|-------|------|------|---|--------|------|---|
| rps13 | 287  | 54   | C | 0.7037 | 37   | U |
| rps19 | 84   | 1252 | C | 0.0119 | 14   | U |
| rps19 | 100  | 1267 | C | 0.0078 | 10   | U |
| rps19 | 116  | 1343 | C | 0.0245 | 32   | U |
| rps19 | 119  | 1349 | C | 0.0081 | 10   | U |
| rps19 | 126  | 1363 | C | 0.0124 | 17   | U |
| rps19 | 138  | 1367 | C | 0.8317 | 1137 | U |
| rps19 | 163  | 1335 | C | 0.8838 | 1180 | U |
| rps19 | 164  | 1339 | C | 0.8894 | 1191 | U |
| rps19 | 183  | 1369 | T | 0.0138 | 19   | C |
| rps19 | 199  | 1723 | C | 0.0882 | 152  | U |
| rps19 | 240  | 1678 | T | 0.2902 | 487  | C |
| rps19 | 258  | 1577 | A | 0.305  | 481  | G |
| rps19 | 263  | 1357 | T | 0.3507 | 468  | G |
| rps19 | 264  | 1343 | A | 0.0089 | 10   | G |
| rps19 | 271  | 1321 | G | 0.3489 | 456  | A |
| rps1  | 23   | 27   | C | 0.8148 | 22   | U |
| rps1  | 158  | 14   | C | 0.7142 | 10   | U |
| rps3  | 7    | 952  | C | 0.0661 | 62   | U |
| rps3  | 92   | 475  | C | 0.9768 | 463  | U |
| rps3  | 100  | 452  | C | 0.0221 | 10   | U |
| rps3  | 126  | 534  | C | 0.0973 | 52   | U |
| rps3  | 131  | 525  | C | 0.019  | 10   | U |
| rps3  | 227  | 636  | C | 0.0172 | 11   | U |
| rps3  | 320  | 573  | C | 0.1134 | 63   | U |
| rps3  | 324  | 588  | C | 0.2261 | 133  | U |
| rps3  | 518  | 851  | C | 0.913  | 776  | U |
| rps3  | 719  | 802  | C | 0.9638 | 773  | U |
| rps3  | 762  | 716  | C | 0.0223 | 16   | U |
| rps3  | 943  | 877  | C | 0.0672 | 59   | U |
| rps3  | 1037 | 822  | C | 0.7992 | 657  | U |
| rps3  | 1261 | 1849 | C | 0.007  | 13   | U |
| rps3  | 1262 | 1877 | C | 0.0724 | 136  | U |
| rps3  | 1307 | 2318 | C | 0.0133 | 30   | U |
| rps3  | 1338 | 2499 | C | 0.0116 | 29   | U |
| rps3  | 1349 | 2531 | C | 0.0086 | 22   | U |
| rps3  | 1372 | 2728 | C | 0.0278 | 76   | U |
| rps3  | 1382 | 2720 | C | 0.0176 | 46   | U |
| rps3  | 1384 | 2720 | C | 0.0577 | 157  | U |
| rps3  | 1385 | 2725 | C | 0.9944 | 2710 | U |
| rps3  | 1412 | 2845 | C | 0.9936 | 2825 | U |
| rps3  | 1430 | 2732 | C | 0.012  | 31   | U |

---

---

|      |      |      |   |        |      |   |
|------|------|------|---|--------|------|---|
| rps3 | 1435 | 2809 | C | 0.0188 | 52   | U |
| rps3 | 1440 | 2735 | C | 0.0164 | 45   | U |
| rps3 | 1464 | 2586 | T | 0.0077 | 18   | C |
| rps3 | 1468 | 2619 | C | 0.0064 | 16   | U |
| rps3 | 1482 | 2635 | A | 0.0053 | 12   | G |
| rps3 | 1484 | 2651 | A | 0.0067 | 14   | G |
| rps3 | 1490 | 2465 | T | 0.0304 | 62   | G |
| rps3 | 1492 | 2713 | G | 0.0121 | 33   | U |
| rps3 | 1493 | 2928 | A | 0.0058 | 10   | G |
| rps3 | 1499 | 3448 | T | 0.0043 | 10   | G |
| rps3 | 1501 | 3535 | C | 0.0067 | 20   | U |
| rps3 | 1506 | 3762 | A | 0.0098 | 15   | C |
| rps3 | 1514 | 3905 | C | 0.0048 | 19   | U |
| rps3 | 1519 | 3938 | C | 0.0043 | 17   | U |
| rps3 | 1532 | 4069 | C | 0.0036 | 13   | U |
| rps3 | 1547 | 4239 | C | 0.0061 | 26   | U |
| rps3 | 1554 | 4224 | C | 0.0033 | 13   | U |
| rps3 | 1557 | 4266 | A | 0.0089 | 23   | G |
| rps3 | 1574 | 4215 | C | 0.0251 | 105  | U |
| rps3 | 1576 | 4207 | C | 0.9933 | 4179 | U |
| rps3 | 1609 | 3953 | C | 0.9984 | 3946 | U |
| rps3 | 1613 | 3947 | C | 0.003  | 11   | U |
| rps3 | 1622 | 3935 | C | 0.0218 | 86   | U |
| rps3 | 1638 | 3527 | C | 0.0345 | 122  | U |
| rps3 | 1640 | 3464 | C | 0.9919 | 3435 | U |
| rps3 | 1646 | 2699 | T | 0.0118 | 32   | C |
| rps3 | 1648 | 2646 | A | 0.0105 | 13   | G |
| rps3 | 1656 | 2071 | G | 0.0053 | 11   | A |
| rps3 | 1657 | 1700 | A | 0.0217 | 21   | G |
| rps3 | 1658 | 1460 | T | 0.0232 | 19   | G |
| rps4 | 38   | 26   | C | 0.5    | 13   | U |
| rps4 | 266  | 46   | C | 0.7173 | 33   | U |
| rps4 | 278  | 43   | C | 0.4651 | 20   | U |
| rps4 | 290  | 40   | C | 0.85   | 34   | U |
| rps4 | 335  | 48   | C | 0.9375 | 43   | U |
| rps4 | 399  | 41   | C | 0.2682 | 11   | U |
| rps4 | 468  | 52   | C | 0.1923 | 10   | U |
| rps4 | 671  | 49   | C | 0.4081 | 20   | U |
| rps4 | 800  | 38   | C | 0.3421 | 13   | U |
| rps4 | 811  | 39   | C | 0.7948 | 31   | U |
| rps4 | 821  | 38   | C | 0.3157 | 12   | U |
| rps4 | 836  | 37   | C | 0.5405 | 20   | U |

---

---

|      |     |     |   |        |     |   |
|------|-----|-----|---|--------|-----|---|
| rps4 | 887 | 52  | C | 0.4807 | 25  | U |
| rps4 | 901 | 53  | C | 0.6603 | 35  | U |
| sdh4 | 29  | 65  | C | 0.9846 | 64  | U |
| sdh4 | 39  | 82  | C | 0.9024 | 74  | U |
| sdh4 | 132 | 205 | C | 0.0975 | 20  | U |
| sdh4 | 153 | 226 | C | 0.761  | 172 | U |
| sdh4 | 154 | 225 | C | 0.7511 | 169 | U |
| sdh4 | 200 | 258 | C | 0.7054 | 182 | U |
| sdh4 | 209 | 266 | C | 0.6165 | 164 | U |
| sdh4 | 265 | 258 | C | 0.9069 | 234 | U |
| sdh4 | 354 | 134 | C | 0.4701 | 63  | U |
| sdh4 | 359 | 128 | C | 0.9609 | 123 | U |

---

18

19

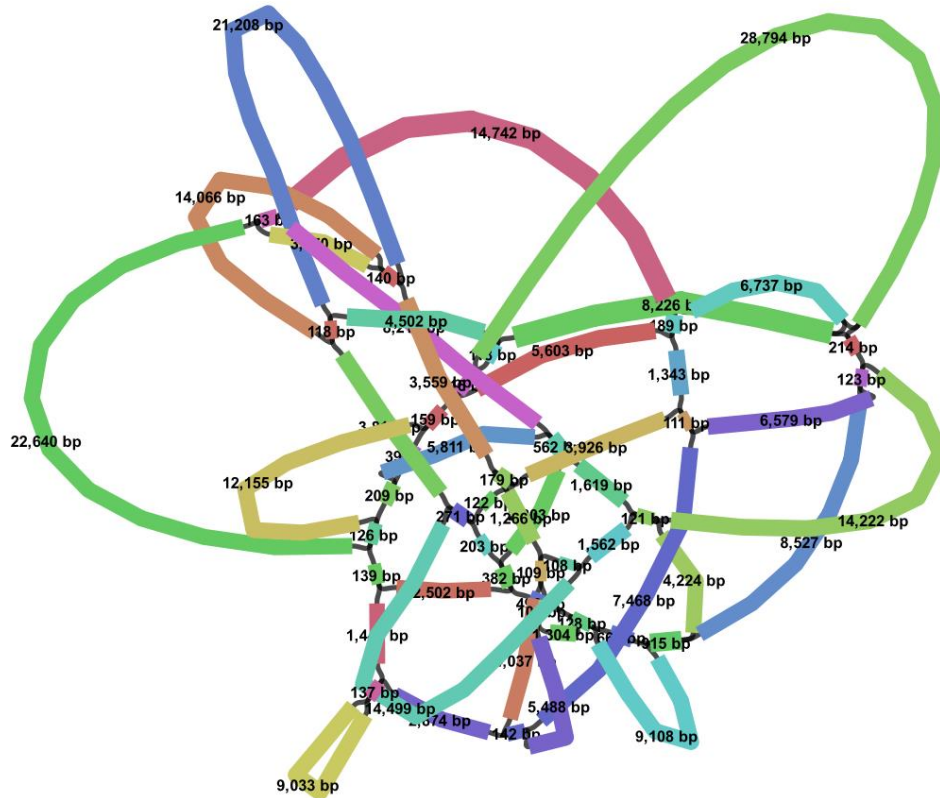

**Figure S1. The graph-based mitochondrial genome of *I. batatas*.** The graph results were visualized with Bange. The colorful line segments represent different mitochondrial genome segments and the black lines represent potential linkage patterns.

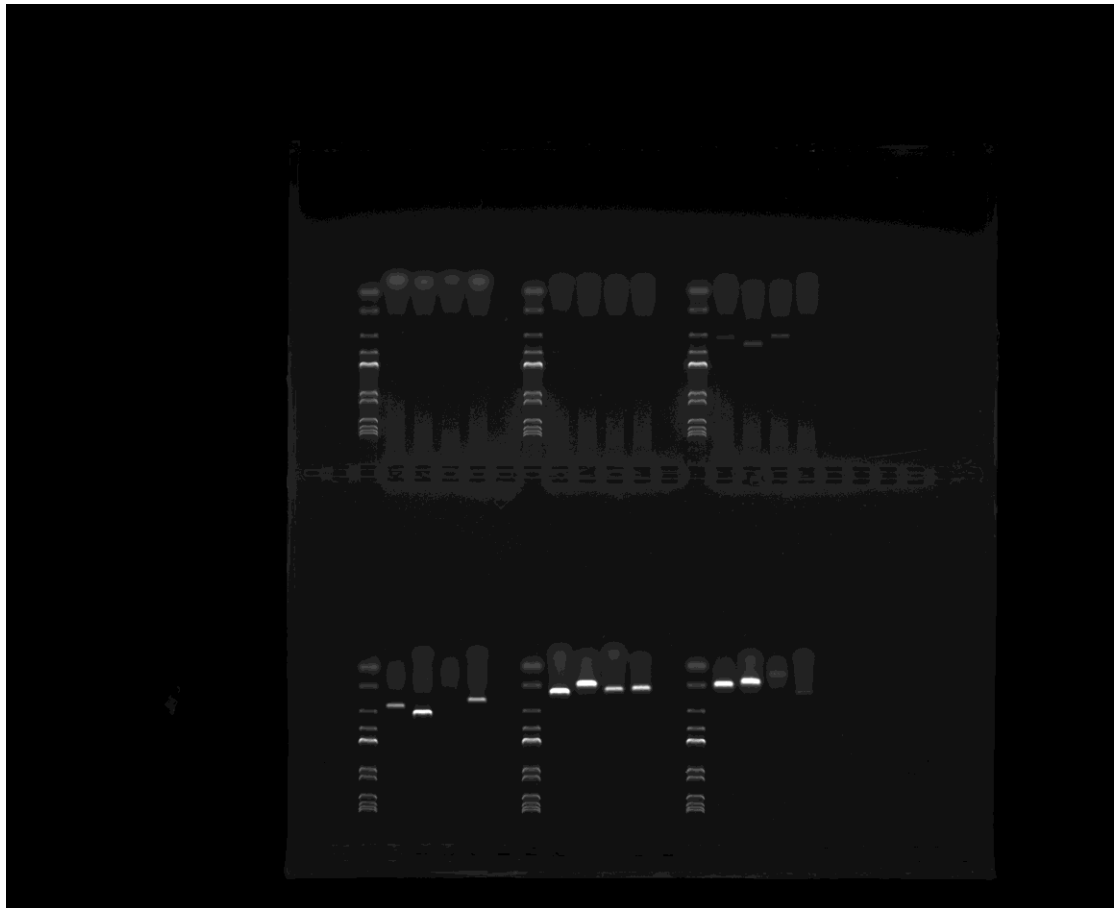

**Figure S2.** The raw Gel diagram of agarose gel electrophoresis. The bottom half of the image shows the results in Figure 2 of this study.
